# Supplementary material for: A KDM5–Prospero transcriptional axis functions during early neurodevelopment to regulate mushroom body formation
Source: eLife journal article supplement (doi:10.7554/elife.63886), 2021-03-17
Supplement: supp [file elife-63886-supp-v1.zip]

Archive with 13 entries (13 files):
- elife_poa_e63886_Transparent_Reporting_File.docx
- elife_poa_e63886_Figure_3_figure_supplement_1.pdf
- elife_poa_e63886_Figure_5_figure_supplement_1.pdf
- elife_poa_e63886_Figure_5_figure_supplement_2.pdf
- elife_poa_e63886_Figure_5_figure_supplement_3.pdf
- elife_poa_e63886_Figure_5_figure_supplement_4.pdf
- elife_poa_e63886_Figure_5_figure_supplement_5.pdf
- elife_poa_e63886_Supplementary_file_1.xlsx
- elife_poa_e63886_Supplementary_file_2.xlsx
- elife_poa_e63886_Supplementary_file_3.xlsx
- elife_poa_e63886_Supplementary_file_4.xlsx
- elife_poa_e63886_Supplementary_file_5.xlsx
- elife_poa_e63886_Supplementary_file_6.xlsx
