# Supplementary material for: A KDM5–Prospero transcriptional axis functions during early neurodevelopment to regulate mushroom body formation
Source: eLife journal article supplement (doi:10.7554/elife.63886), 2021-03-17
Supplement: supp [file elife-63886-supp-v1.zip › elife_poa_e63886_Supplementary_file_1.xlsx]

## Sheet: Sheet1
gene name	FBID_KEY_140	M (log2FC)_140	FDR
snoRNA:U3:54Ab	FBgn0065047	-3.17814	0.000352073
5SrRNA-Psi:CR33416	FBgn0053416	-3.12623	0.0457013
snRNA:U11	FBgn0083987	-2.71913	0.0010619
snRNA:U1:82Eb	FBgn0004183	-2.69472	0.00134583
snoRNA:lola-c	FBgn0263482	-2.64226	0.00237365
mir-13b-1	FBgn0262367	-2.62199	0.00154458
snRNA:U1:95Cc	FBgn0004187	-2.61496	0.000843271
snoRNA:Me18S-A1061	FBgn0082952	-2.56809	0.00107041
snoRNA:Me18S-G1952	FBgn0082950	-2.56809	0.00107041
snRNA:U5:38ABb	FBgn0043021	-2.56278	0.00544577
lncRNA:CR44700	FBgn0265911	-2.5202	0.00391539
CG44242	FBgn0265177	-2.51912	0.000570698
His1:CG33804	FBgn0053804	-2.49984	0.00629472
mir-981	FBgn0262178	-2.48257	0.00180863
snoRNA:lola-b	FBgn0263481	-2.44469	0.00164963
snRNA:U1:95Ca	FBgn0004185	-2.43924	0.000562181
lncRNA:CR44826	FBgn0266073	-2.40631	0.00734526
snRNA:U2:34ABa	FBgn0004191	-2.39863	0.000775128
lncRNA:CR44446	FBgn0265639	-2.39306	0.00222601
snRNA:U5:38ABa	FBgn0043022	-2.39002	0.00181715
mir-954	FBgn0262302	-2.32771	0.00174049
tRNA:His-GTG-1-5	FBgn0050223	-2.28707	0.0121096
snRNA:U4:38AB	FBgn0003931	-2.22684	0.00454571
lncRNA:CR13130	FBgn0040965	-2.1815	0.00256956
KP78a	FBgn0026064	-2.15444	0.00182567
KP78b	FBgn0026063	-2.15444	0.00182567
snoRNA:Me28S-A992	FBgn0082941	-2.14084	0.00691369
tRNA:Pro-AGG-1-5	FBgn0052129	-2.1195	0.0375894
wor	FBgn0001983	-2.09222	0.00557922
lncRNA:CR44770	FBgn0265995	-2.05941	0.0148069
nerfin-1	FBgn0028999	-2.04957	0.00147927
CR43080	FBgn0262510	-2.04179	0.00448041
Gadd45	FBgn0033153	-2.01051	0.0211244
snoRNA:Me28S-C3227b	FBgn0082939	-1.98405	0.00179443
snoRNA:Me28S-U1848	FBgn0082926	-1.98405	0.00179443
snoRNA:lola-d	FBgn0263483	-1.9781	0.00558489
asRNA:CR44027	FBgn0264819	-1.96673	0.00173481
lncRNA:TS18	FBgn0265642	-1.96488	0.0226065
E(spl)mgamma-HLH	FBgn0002735	-1.95474	0.00379614
lncRNA:CR46009	FBgn0267673	-1.94379	0.00328223
lncRNA:CR45744	FBgn0267308	-1.91282	0.00456843
lncRNA:CR44411	FBgn0265584	-1.91032	0.00174049
CG8237	FBgn0033350	-1.90487	0.015318
lncRNA:CR44861	FBgn0266155	-1.90399	0.00559341
snRNA:U2:34ABb	FBgn0004192	-1.89171	0.0066837
snRNA:U4atac	FBgn0263018	-1.88356	0.00703578
snoRNA:U14:30Eb	FBgn0063391	-1.87834	0.00463657
snRNA:U1:95Cb	FBgn0004186	-1.87475	0.00482396
dati	FBgn0262636	-1.8555	0.00311471
bou	FBgn0261284	-1.85407	0.00190233
snRNA:U1:21D	FBgn0003916	-1.85333	0.00197615
RpS28b	FBgn0030136	-1.84805	0.00386428
CG32806	FBgn0052806	-1.8275	0.00394378
lncRNA:CR44993	FBgn0266328	-1.79321	0.00289608
lncRNA:CR45910	FBgn0267570	-1.79003	0.00246167
snRNA:LU	FBgn0263847	-1.78434	0.0159682
Bacc	FBgn0031453	-1.76065	0.00256388
Act5C	FBgn0000042	-1.75643	0.00260647
asRNA:CR45135	FBgn0266628	-1.75537	0.00225724
CG16957	FBgn0032519	-1.75526	0.0257411
asRNA:CR45396	FBgn0266945	-1.74887	0.00237933
CR32745	FBgn0052745	-1.74883	0.00996309
lncRNA:CR43635	FBgn0263626	-1.74237	0.00286201
emc	FBgn0000575	-1.72946	0.00281942
lncRNA:CR33218	FBgn0053218	-1.72634	0.00840716
mir-2b-1	FBgn0262374	-1.70848	0.026096
lncRNA:CR45556	FBgn0267116	-1.70185	0.0121068
lncRNA:cherub	FBgn0262972	-1.68548	0.00629472
lncRNA:CR45688	FBgn0267248	-1.6849	0.0082084
snRNA:U2:38ABa	FBgn0003922	-1.68134	0.0201988
snRNA:U5:63BC	FBgn0003938	-1.67875	0.00899205
danr	FBgn0039283	-1.67328	0.00372516
mir-1000	FBgn0262319	-1.66371	0.00298126
lncRNA:CR44771	FBgn0265996	-1.65947	0.0226661
lncRNA:CR43857	FBgn0264439	-1.64479	0.0033958
toy	FBgn0019650	-1.64261	0.00655593
Optix	FBgn0025360	-1.64122	0.0133447
lncRNA:CR45695	FBgn0267259	-1.63866	0.00309199
snoRNA:lola-a	FBgn0263466	-1.63532	0.00287053
snRNA:U4:39B	FBgn0003930	-1.63448	0.0242306
Hsp67Bc	FBgn0001229	-1.63091	0.00333333
lncRNA:CR44862	FBgn0266156	-1.62809	0.00473027
E(spl)m7-HLH	FBgn0002633	-1.62633	0.00382169
CG17648	FBgn0031364	-1.62592	0.0251931
asRNA:CR45611	FBgn0267171	-1.6209	0.00330494
elav	FBgn0260400	-1.61279	0.00391823
insb	FBgn0034224	-1.61192	0.0040176
lncRNA:CR46056	FBgn0267723	-1.60932	0.00733674
lncRNA:CR45439	FBgn0266988	-1.6085	0.0171153
arg	FBgn0023535	-1.60526	0.00412834
ase	FBgn0000137	-1.59847	0.00427598
lncRNA:CR43724	FBgn0263970	-1.5866	0.016962
lncRNA:CR45595	FBgn0267155	-1.5857	0.0058092
wuc	FBgn0033770	-1.57362	0.0120727
mir-279	FBgn0262448	-1.57022	0.00581772
tap	FBgn0015550	-1.56766	0.0136797
lncRNA:CR45698	FBgn0267262	-1.55449	0.00382453
lncRNA:acal	FBgn0283426	-1.55151	0.00436968
mir-124	FBgn0262398	-1.5465	0.00467064
Uhg5	FBgn0083123	-1.538	0.00948325
lncRNA:CR44851	FBgn0266145	-1.53413	0.00447473
lncRNA:CR45527	FBgn0267083	-1.53013	0.00494321
lncRNA:CR43435	FBgn0263383	-1.52924	0.00534923
asRNA:CR45397	FBgn0266946	-1.52791	0.00475298
l(1)sc	FBgn0002561	-1.5278	0.0460903
dap	FBgn0010316	-1.52632	0.0073481
lncRNA:CR45919	FBgn0267579	-1.52594	0.00414821
lncRNA:CR44983	FBgn0266318	-1.46971	0.00682851
lncRNA:CR44306	FBgn0265365	-1.4673	0.00741624
lncRNA:CR43973	FBgn0264704	-1.46519	0.00657865
lncRNA:CR45267	FBgn0266805	-1.45984	0.0300965
lncRNA:CR45233	FBgn0266768	-1.45385	0.00490914
tRNA:Arg-TCT-2-1	FBgn0051942	-1.4532	0.0350028
whip	FBgn0250827	-1.44996	0.0181289
lncRNA:CR44410	FBgn0265583	-1.4475	0.00541454
lncRNA:CR44272	FBgn0265299	-1.44704	0.00447757
lncRNA:CR46001	FBgn0267663	-1.44094	0.0304032
tRNA:Leu-TAA-2-1	FBgn0053536	-1.4383	0.0120897
hubl	FBgn0050364	-1.43459	0.0173907
spaw	FBgn0050365	-1.43459	0.0173907
E(spl)m8-HLH	FBgn0000591	-1.4272	0.00558206
lncRNA:CR46200	FBgn0267919	-1.42507	0.0221181
CG42846	FBgn0262035	-1.41392	0.0156871
CG34300	FBgn0085329	-1.41315	0.0155309
lncRNA:CR44295	FBgn0265341	-1.40904	0.0450596
asRNA:CR45208	FBgn0266735	-1.40462	0.0105423
CG13962	FBgn0032824	-1.40035	0.0181545
mir-276a	FBgn0266076	-1.39879	0.00973311
lncRNA:CR44772	FBgn0265997	-1.39792	0.00520727
CG44439	FBgn0265632	-1.38559	0.025565
lncRNA:CR46098	FBgn0267767	-1.38053	0.00641113
CG7370	FBgn0037133	-1.37867	0.00816014
CG31997	FBgn0051997	-1.37585	0.0403464
CG31715	FBgn0051715	-1.37453	0.0120443
asRNA:CR45270	FBgn0266808	-1.37203	0.0201306
mRpL40	FBgn0037892	-1.36805	0.0077456
asRNA:CR45257	FBgn0266795	-1.36785	0.00582624
mir-4978	FBgn0263539	-1.36617	0.00711528
scyl	FBgn0041094	-1.35895	0.0112805
Hsp67Ba	FBgn0001227	-1.35417	0.00626633
tRNA:Gly-GCC-1-6	FBgn0011864	-1.35177	0.0358631
lncRNA:CR44537	FBgn0265730	-1.35173	0.0318683
CG13287	FBgn0035643	-1.3509	0.0223992
snRNA:U5:14B	FBgn0003933	-1.33813	0.0446706
lncRNA:CR45115	FBgn0266590	-1.33801	0.0106786
CG14989	FBgn0035495	-1.33602	0.0115247
asRNA:CR42738	FBgn0261702	-1.3296	0.0294691
lncRNA:CR33963	FBgn0053963	-1.31576	0.011414
CG43116	FBgn0262576	-1.3149	0.0213203
CG9921	FBgn0030743	-1.31406	0.01046
CR43669	FBgn0263744	-1.30256	0.0107865
mir-932	FBgn0262205	-1.30036	0.0468257
RpS21	FBgn0015521	-1.29936	0.0217178
lncRNA:CR45128	FBgn0266621	-1.29867	0.0136684
CG32625	FBgn0052625	-1.29652	0.0080636
Sox21a	FBgn0036411	-1.28685	0.0404884
tRNA:Leu-TAA-4-1	FBgn0051130	-1.28615	0.0397729
lola	FBgn0283521	-1.28395	0.00876491
CG45428	FBgn0266977	-1.28385	0.00831062
betaTub56D	FBgn0284243	-1.27482	0.00764338
CG11226	FBgn0037195	-1.27409	0.00903748
CG2127	FBgn0033286	-1.27247	0.019699
CG9662	FBgn0031529	-1.2718	0.0304344
hng3	FBgn0035160	-1.27169	0.0145486
lncRNA:CR44344	FBgn0265444	-1.26887	0.0179671
CG2854	FBgn0040391	-1.26812	0.032598
lncRNA:CR42862	FBgn0262109	-1.26397	0.00833617
CG33137	FBgn0053137	-1.25404	0.0154231
cas	FBgn0004878	-1.25311	0.0172714
lncRNA:CR45754	FBgn0267318	-1.2467	0.0356303
mir-275	FBgn0262453	-1.24565	0.00821408
mir-305	FBgn0262458	-1.24565	0.00821408
lncRNA:CR46265	FBgn0275433	-1.2439	0.0117802
pros	FBgn0004595	-1.24272	0.0103663
lncRNA:CR44414	FBgn0265587	-1.23888	0.0478109
Hsp23	FBgn0001224	-1.23426	0.00821124
snoRNA:Me5.8S-G74	FBgn0086066	-1.2328	0.020071
snoRNA:185	FBgn0065076	-1.22754	0.0148296
Hey	FBgn0027788	-1.22734	0.0144634
snoRNA:Me18S-C1366	FBgn0082951	-1.2176	0.0107439
snoRNA:Me28S-C3227a	FBgn0082940	-1.2176	0.0107439
COX8	FBgn0263911	-1.20973	0.0111897
Ets65A	FBgn0005658	-1.20682	0.0358064
tRNA:Ile-AAT-1-9	FBgn0050215	-1.20641	0.0216581
lncRNA:CR45112	FBgn0266587	-1.20609	0.0101193
CG17778	FBgn0023534	-1.20469	0.0136428
His2B:CG33908	FBgn0053908	-1.20369	0.0196877
lncRNA:CR42721	FBgn0261638	-1.20357	0.0156502
RpS15	FBgn0034138	-1.20202	0.0211187
cola	FBgn0050363	-1.19828	0.0275554
swif	FBgn0050366	-1.19828	0.0275554
Arc2	FBgn0033928	-1.19806	0.0231431
Fer2	FBgn0038402	-1.19723	0.0263884
snoRNA:Me28S-G2703a	FBgn0082931	-1.19652	0.0475866
snoRNA:Me28S-G2703b	FBgn0082930	-1.19652	0.0475866
snoRNA:Me28S-G2703c	FBgn0082929	-1.19652	0.0475866
tRNA:Ala-CGC-1-2	FBgn0050199	-1.19519	0.0177655
tRNA:Ala-CGC-1-3	FBgn0050200	-1.19519	0.0177655
tRNA:iMet-CAT-1-3	FBgn0052482	-1.19422	0.031201
lncRNA:CR44567	FBgn0265760	-1.19368	0.0289807
Df31	FBgn0022893	-1.19368	0.0166241
CG40228	FBgn0063670	-1.18631	0.0267916
sna	FBgn0003448	-1.18151	0.0200454
Cyp1	FBgn0004432	-1.17881	0.00993186
Oli	FBgn0032651	-1.17465	0.0114424
Calr	FBgn0005585	-1.17401	0.0102328
Bro	FBgn0013755	-1.17324	0.0239608
mir-4961	FBgn0263552	-1.16913	0.0271096
lncRNA:roX2	FBgn0019660	-1.1667	0.0164055
CG15482	FBgn0032483	-1.16227	0.0104401
lncRNA:CR44120	FBgn0264951	-1.15947	0.0157524
CG14610	FBgn0037477	-1.15879	0.0413288
Rx	FBgn0020617	-1.15797	0.040335
Nrt	FBgn0004108	-1.1548	0.0135718
boly	FBgn0050362	-1.15157	0.0331942
CG42393	FBgn0259739	-1.15097	0.0145741
lncRNA:CR45111	FBgn0266586	-1.15093	0.0129898
CR45391	FBgn0266940	-1.15064	0.0290034
asRNA:CR43481	FBgn0263492	-1.14403	0.0131885
mir-8	FBgn0262432	-1.1414	0.0298325
ey	FBgn0005558	-1.14098	0.0361386
snoRNA:Me18S-G1358a	FBgn0086053	-1.13008	0.0117235
lncRNA:CR44041	FBgn0264833	-1.12631	0.0272317
lncRNA:CR31044	FBgn0051044	-1.12532	0.0274673
ix	FBgn0001276	-1.11867	0.0393413
CG3939	FBgn0040396	-1.1113	0.0126746
CG11700	FBgn0029856	-1.11023	0.0162152
lncRNA:CR31386	FBgn0051386	-1.10504	0.0202953
Rap2l	FBgn0283666	-1.10467	0.0133674
dac	FBgn0005677	-1.10306	0.0303152
CG17272	FBgn0038830	-1.10208	0.0124248
RpL39	FBgn0023170	-1.10029	0.020636
VGlut	FBgn0031424	-1.09978	0.0280664
lncRNA:CR45643	FBgn0267203	-1.09623	0.011803
asRNA:CR46145	FBgn0267820	-1.09432	0.0128677
lncRNA:CR46229	FBgn0267949	-1.0919	0.0277286
CG32147	FBgn0047178	-1.09109	0.0141794
lncRNA:CR44550	FBgn0265743	-1.09037	0.0400795
lncRNA:CR45997	FBgn0267659	-1.08836	0.0491511
jigr1	FBgn0039350	-1.08588	0.0291652
mus302	FBgn0287696	-1.08541	0.0177257
lncRNA:CR46211	FBgn0267930	-1.08426	0.0388558
mir-985	FBgn0262283	-1.08426	0.0388558
lncRNA:CR45199	FBgn0266726	-1.07841	0.0286968
lncRNA:CR45618	FBgn0267178	-1.07549	0.0275724
RpS3A	FBgn0017545	-1.07427	0.0265219
mir-996	FBgn0262404	-1.072	0.0318512
lncRNA:CR45922	FBgn0267582	-1.07194	0.0256076
CG2217	FBgn0027544	-1.07124	0.031644
CG42740	FBgn0261704	-1.07124	0.031644
CG18449	FBgn0033285	-1.07043	0.0436882
lncRNA:CR30055	FBgn0050055	-1.06473	0.0135264
lncRNA:CR45125	FBgn0266618	-1.06262	0.017632
CG15638	FBgn0028943	-1.06192	0.0252811
Glyat	FBgn0054010	-1.06168	0.0470528
Hr51	FBgn0034012	-1.06021	0.0355934
tRNA:Glu-TTC-1-4	FBgn0011850	-1.05978	0.0201107
CG34454	FBgn0085483	-1.05912	0.0329529
VAChT	FBgn0270928	-1.05801	0.0219108
TfAP-2	FBgn0261953	-1.05359	0.0446792
lncRNA:CR46113	FBgn0267782	-1.0478	0.0162521
CG44314	FBgn0265373	-1.04572	0.0195883
lncRNA:CR44941	FBgn0266246	-1.04433	0.0432567
lncRNA:CR43285	FBgn0262974	-1.04301	0.0198978
lncRNA:CR31451	FBgn0051451	-1.04043	0.0153492
lncRNA:CR45659	FBgn0267219	-1.03834	0.0162862
CG8701	FBgn0033287	-1.03823	0.0346593
lncRNA:CR45566	FBgn0267126	-1.03708	0.0148552
lncRNA:CR44033	FBgn0264825	-1.03468	0.0180892
pdm3	FBgn0261588	-1.03441	0.0383163
CG15233	FBgn0033076	-1.03211	0.0409625
lncRNA:CR44857	FBgn0266151	-1.0285	0.0490886
CG10466	FBgn0032822	-1.02452	0.0227712
CG1532	FBgn0031143	-1.02308	0.0487649
lncRNA:CR43297	FBgn0262989	-1.01608	0.0405934
mir-10	FBgn0262424	-1.01605	0.0214991
CG15353	FBgn0040718	-1.01511	0.0221493
lncRNA:CR43653	FBgn0263662	-1.01496	0.0434639
snoRNA:Psi18S-1347a	FBgn0083054	-1.01251	0.0357808
neur	FBgn0002932	-1.01187	0.0284611
mir-let7	FBgn0262406	-1.00952	0.0358631
lncRNA:CR45392	FBgn0266941	-1.00909	0.0249404
hoip	FBgn0286786	-1.00754	0.0153719
snoRNA:CD-24	FBgn0263851	-1.00584	0.0469591
Obp28a	FBgn0011283	-1.00546	0.0462209
RpL32	FBgn0002626	-1.00316	0.0254656
lncRNA:CR45707	FBgn0267271	-1.00088	0.0472686
snoRNA:Or-CD11a	FBgn0086072	-0.999733	0.0166865
snoRNA:Or-CD11b	FBgn0086071	-0.999733	0.0166865
CG9837	FBgn0037635	-0.999247	0.0255735
lncRNA:CR44930	FBgn0266235	-0.995948	0.0245457
snoRNA:Me28S-G3081a	FBgn0063381	-0.994298	0.0183674
lncRNA:CR46147	FBgn0267826	-0.992689	0.0178961
chic	FBgn0000308	-0.992417	0.0180636
brk	FBgn0024250	-0.989846	0.0253719
Fer1	FBgn0037475	-0.987234	0.0481317
lncRNA:CR45593	FBgn0267153	-0.987172	0.0176576
CG32182	FBgn0052182	-0.984309	0.021803
esg	FBgn0287768	-0.984288	0.0308262
CG3408	FBgn0036008	-0.982651	0.0192987
eEF1alpha1	FBgn0284245	-0.980643	0.0192873
CG32450	FBgn0052450	-0.979492	0.0223481
lncRNA:CR45915	FBgn0267575	-0.975891	0.0205508
CG13773	FBgn0042092	-0.974952	0.0291624
CG14050	FBgn0040392	-0.96504	0.0448495
lncRNA:CR44762	FBgn0265983	-0.960603	0.0198325
lncRNA:CR45914	FBgn0267574	-0.959841	0.0331715
CG6610	FBgn0035675	-0.958675	0.0196678
galectin	FBgn0031213	-0.958554	0.0289864
snoRNA:Me28S-C2645a	FBgn0082938	-0.95756	0.0446479
smt3	FBgn0264922	-0.956786	0.0177882
ND-B14.5B	FBgn0031505	-0.95166	0.0228961
l(3)neo38	FBgn0265276	-0.94673	0.0223254
snoRNA:Me18S-A1576	FBgn0025881	-0.946371	0.0183419
DJ-1alpha	FBgn0033885	-0.943971	0.0351902
snRNA:U2:14B	FBgn0003920	-0.942046	0.0397217
asRNA:CR45873	FBgn0267533	-0.939289	0.0208575
lncRNA:CR32218	FBgn0052218	-0.938459	0.032243
lncRNA:CR43988	FBgn0264720	-0.936135	0.0464651
Rpb12	FBgn0262954	-0.9358	0.0329585
CG12112	FBgn0030048	-0.934209	0.024858
CG18641	FBgn0031426	-0.929053	0.0443867
lncRNA:CR44551	FBgn0265744	-0.928383	0.0450057
RpS2	FBgn0004867	-0.927742	0.0334583
CG42392	FBgn0259738	-0.925722	0.0229784
dan	FBgn0039286	-0.925311	0.0477286
lncRNA:CR45917	FBgn0267577	-0.924956	0.0366951
lncRNA:CR44943	FBgn0266248	-0.924511	0.0326746
cni	FBgn0000339	-0.917603	0.0334299
lncRNA:CR43437	FBgn0263385	-0.916713	0.0305934
lncRNA:CR45911	FBgn0267571	-0.91336	0.0206332
Dsp1	FBgn0278608	-0.913147	0.0246508
E(spl)mbeta-HLH	FBgn0002733	-0.908505	0.0241454
CG5144	FBgn0035957	-0.906611	0.0453691
Rab14	FBgn0015791	-0.906598	0.026837
Uhg2	FBgn0063449	-0.902647	0.023251
asRNA:CR45525	FBgn0267081	-0.902531	0.0431403
glec	FBgn0015229	-0.902152	0.0381317
asRNA:CR45146	FBgn0266639	-0.90203	0.029134
CG13891	FBgn0035139	-0.901033	0.0399972
mira	FBgn0021776	-0.900341	0.0406388
CG33155	FBgn0053155	-0.899716	0.0235065
mRpL53	FBgn0050481	-0.899716	0.0235065
lncRNA:CR45407	FBgn0266956	-0.899254	0.0232283
CG6870	FBgn0032652	-0.898101	0.0408234
tRNA:iMet-CAT-1-2	FBgn0050218	-0.893113	0.0451817
CG14505	FBgn0034327	-0.888809	0.0354032
lgs	FBgn0039907	-0.887628	0.0466298
REPTOR-BP	FBgn0032202	-0.883934	0.0303861
Gad1	FBgn0004516	-0.880818	0.0447274
mir-13a	FBgn0262429	-0.879592	0.0234668
GstZ1	FBgn0037696	-0.869006	0.045812
Trx-2	FBgn0040070	-0.868815	0.025
lncRNA:CR44221	FBgn0265152	-0.868226	0.0495968
lncRNA:CR44268	FBgn0265254	-0.867541	0.0240148
CG34163	FBgn0085192	-0.866203	0.0344747
asRNA:CR43820	FBgn0264368	-0.865115	0.0249461
lncRNA:CR44763	FBgn0265984	-0.864706	0.0348552
mir-2282	FBgn0262260	-0.862597	0.0419392
Fis1	FBgn0039969	-0.859743	0.0289608
CG5214	FBgn0037891	-0.858936	0.0336684
Hsc70-4	FBgn0266599	-0.858877	0.0277513
grk	FBgn0001137	-0.857932	0.045071
CG14312	FBgn0038596	-0.857865	0.0245003
snoRNA:Or-CD11c	FBgn0086070	-0.853622	0.0319108
eIF4A	FBgn0001942	-0.851793	0.032297
7B2	FBgn0041707	-0.84762	0.024929
Diap1	FBgn0260635	-0.84693	0.0264566
asRNA:CR44340	FBgn0265428	-0.84253	0.0258575
Akap200	FBgn0027932	-0.842515	0.0316184
CG15478	FBgn0029955	-0.84138	0.0313941
tRNA:His-GTG-1-2	FBgn0050250	-0.840566	0.0383816
mRpL55	FBgn0038678	-0.838781	0.0271266
alphaTub84B	FBgn0003884	-0.83664	0.0257865
Kdm5	FBgn0031759	-0.835756	0.0435974
snoRNA:Me28S-A1322	FBgn0015543	-0.832903	0.0265673
noc	FBgn0005771	-0.832795	0.0333333
CG13204	FBgn0033627	-0.830915	0.0390602
tRNA:Glu-CTC-2-3	FBgn0052460	-0.83061	0.0304571
lncRNA:CR44417	FBgn0265590	-0.82866	0.0321266
Sfp79B	FBgn0259973	-0.826613	0.0390261
Dic3	FBgn0033248	-0.824915	0.0495315
jim	FBgn0027339	-0.819686	0.0408887
hng2	FBgn0037634	-0.817818	0.0303805
crol	FBgn0020309	-0.814388	0.0384753
asRNA:CR44124	FBgn0264955	-0.812263	0.0284441
CG9919	FBgn0030742	-0.810102	0.0367547
mir-317	FBgn0262378	-0.804019	0.0352442
mir-9c	FBgn0262430	-0.803101	0.0302754
Rcd4	FBgn0032034	-0.802445	0.0315531
CG5828	FBgn0031682	-0.802193	0.0417575
brat	FBgn0010300	-0.800068	0.0371692
lncRNA:CR44220	FBgn0265151	-0.798748	0.0416809
CG33229	FBgn0053229	-0.796719	0.0303294
Gdi	FBgn0004868	-0.794971	0.0371153
CG3437	FBgn0035998	-0.794666	0.032402
snoRNA:Me18S-C1096	FBgn0086055	-0.792488	0.0334327
CG43925	FBgn0264546	-0.789559	0.0333333
CG14042	FBgn0260451	-0.789325	0.0311641
SP555	FBgn0260470	-0.789325	0.0311641
lncRNA:CR44541	FBgn0265734	-0.788443	0.0421096
fend	FBgn0030090	-0.786899	0.049452
snRNA:U12	FBgn0041721	-0.786261	0.0449801
CG17568	FBgn0032763	-0.781427	0.0394094
asRNA:CR31144	FBgn0051144	-0.780057	0.0319989
tsh	FBgn0003866	-0.779108	0.0404032
snoRNA:Me18S-A425	FBgn0086056	-0.772631	0.0325724
Crz	FBgn0013767	-0.76813	0.047561
CG42554	FBgn0260756	-0.767436	0.0481289
asRNA:CR44093	FBgn0264902	-0.765613	0.0334952
RpL23	FBgn0010078	-0.764281	0.0358376
lncRNA:CR44478	FBgn0265671	-0.761771	0.0476888
CNBP	FBgn0034802	-0.750495	0.0413913
Chrac-14	FBgn0043002	-0.748826	0.0433873
tRNA:His-GTG-2-1Psi	FBgn0011877	-0.747765	0.0369705
lncRNA:CR43878	FBgn0264470	-0.746409	0.0486428
asRNA:CR45867	FBgn0267527	-0.741634	0.040954
D1	FBgn0000412	-0.73665	0.0475894
CG15601	FBgn0030673	-0.727439	0.0418654
CG15317	FBgn0030137	-0.725637	0.0441312
lncRNA:CR43821	FBgn0264369	-0.712892	0.0447615
snoRNA:Me18S-G1358b	FBgn0086054	-0.712003	0.0450625
CG10654	FBgn0036294	-0.711771	0.0468995
RpL3	FBgn0020910	-0.711757	0.0477995
CG12868	FBgn0033945	-0.710881	0.0441539
ATPsynG	FBgn0010612	-0.705958	0.0449177
Nepl11	FBgn0037230	-0.700717	0.0411811
asRNA:CR44987	FBgn0266322	-0.697911	0.0491198
CG18598	FBgn0038589	-0.69612	0.0476207
MED21	FBgn0040020	-0.695887	0.0433419
Bka	FBgn0010520	-0.694388	0.04341
asRNA:CR46093	FBgn0267762	-0.691184	0.0442561
ttm2	FBgn0035124	-0.69097	0.0472686
CG14321	FBgn0038540	-0.689497	0.0459909
tRNA:His-GTG-1-4	FBgn0011878	-0.678765	0.0491936
CG42376	FBgn0259722	-0.675299	0.0458206
chm	FBgn0028387	-0.673487	0.0489296
HINT1	FBgn0031459	-0.667557	0.0472232
CG11699	FBgn0030311	0.688061	0.0489523
FeCH	FBgn0266268	0.693175	0.0457638
Nap1	FBgn0015268	0.694866	0.0482851
CG5199	FBgn0036994	0.698956	0.0492476
CG15237	FBgn0033104	0.703818	0.0488529
CG13751	FBgn0033340	0.714251	0.0399375
Sgs8	FBgn0003378	0.71686	0.0434072
Hsp68	FBgn0001230	0.717855	0.0492078
CG5516	FBgn0038389	0.71981	0.0466837
lncRNA:CR45168	FBgn0266678	0.721874	0.042456
CG3500	FBgn0034849	0.739214	0.0448069
Ssb-c31a	FBgn0015299	0.744299	0.0448949
CG31347	FBgn0051347	0.745263	0.0446621
Cndp2	FBgn0287767	0.751692	0.0419165
PPP1R15	FBgn0034948	0.752651	0.0474673
Bap55	FBgn0025716	0.755678	0.0487195
eIF3f1	FBgn0037270	0.756816	0.0410931
asRNA:CR45026	FBgn0266384	0.771241	0.04454
Pfdn6	FBgn0036918	0.774789	0.0365928
Iru	FBgn0037653	0.777049	0.0403407
slmo	FBgn0029161	0.780267	0.0391993
CG2852	FBgn0034753	0.781645	0.0368683
CG4461	FBgn0035982	0.787278	0.0402783
mRpL2	FBgn0036135	0.79003	0.0418484
mRpL22	FBgn0030786	0.791038	0.0465928
Gk1	FBgn0025592	0.792843	0.0466156
asRNA:CR45926	FBgn0267588	0.792937	0.0364963
Hacd1	FBgn0032394	0.798864	0.0381204
Ssu72	FBgn0031054	0.800652	0.0466099
CG5986	FBgn0043455	0.803528	0.0384469
IPIP	FBgn0031768	0.804327	0.0430153
lncRNA:CR45246	FBgn0266781	0.805391	0.0439211
CG3065	FBgn0034946	0.807123	0.0360988
kri	FBgn0035639	0.807645	0.0341851
mri	FBgn0035107	0.812753	0.045795
Aos1	FBgn0029512	0.81659	0.0440999
CG3436	FBgn0031229	0.821451	0.0384725
Lhr	FBgn0034217	0.823607	0.04864
Smn	FBgn0036641	0.827464	0.0307041
CG34179	FBgn0085208	0.833996	0.0345344
mir-4911	FBgn0263525	0.836753	0.0423424
CG43191	FBgn0262820	0.837603	0.0447331
CG2076	FBgn0030263	0.838819	0.0381914
RpS24	FBgn0261596	0.841068	0.0272516
Asciz	FBgn0035407	0.848031	0.0460676
Ipk2	FBgn0031267	0.850602	0.0465247
Noa36	FBgn0026400	0.854333	0.0468115
CG3704	FBgn0040346	0.854924	0.0426405
Daao1	FBgn0033543	0.855104	0.0406672
ste14	FBgn0036336	0.858922	0.0358688
CG3021	FBgn0040337	0.859035	0.0446934
wuho	FBgn0029857	0.864826	0.0446195
CG9609	FBgn0030787	0.865601	0.0421579
MED4	FBgn0035754	0.865993	0.0332936
asRNA:CR45925	FBgn0267587	0.868166	0.0333873
Nup37	FBgn0039301	0.868294	0.0451079
Pop4	FBgn0035831	0.870746	0.030335
hd	FBgn0086695	0.872972	0.0422572
Rrp42	FBgn0034065	0.87528	0.03272
snf	FBgn0003449	0.877327	0.0341283
ReepB	FBgn0033906	0.877383	0.0444094
Scgbeta	FBgn0038042	0.880564	0.0334299
CG3792	FBgn0031662	0.88714	0.0405139
Dgp-1	FBgn0027836	0.898095	0.0485945
CG3534	FBgn0038463	0.903651	0.0478648
CG18600	FBgn0038601	0.906651	0.0432311
Sld5	FBgn0039403	0.910738	0.0479642
CG14805	FBgn0023514	0.91127	0.0361613
RpL41	FBgn0066084	0.912235	0.0496025
CG3776	FBgn0035088	0.915942	0.0436059
CG12171	FBgn0037354	0.916158	0.0336087
TfIIEalpha	FBgn0015828	0.917536	0.0479018
Rrp45	FBgn0030789	0.918868	0.0418171
CG14641	FBgn0037220	0.919879	0.0436059
CG5961	FBgn0038056	0.925751	0.0471153
Pyroxd1	FBgn0032846	0.928857	0.0424077
CG1792	FBgn0039860	0.931586	0.0396167
CG32267	FBgn0052267	0.93262	0.0471948
CG12204	FBgn0031022	0.937045	0.0288671
CG17327	FBgn0038107	0.940394	0.0305877
CG44194	FBgn0265083	0.940394	0.0305877
Scox	FBgn0262467	0.941044	0.0227342
Atg6	FBgn0264325	0.950699	0.0491482
CG11927	FBgn0031638	0.952214	0.0487223
Vha16-5	FBgn0032294	0.954811	0.0251391
Uros1	FBgn0030066	0.960662	0.025318
Xxylt	FBgn0034959	0.965722	0.0250114
RpS10a	FBgn0027494	0.966448	0.0321408
Bgb	FBgn0013753	0.971878	0.03818
CG13231	FBgn0033580	0.974668	0.0287649
Abp1	FBgn0036372	0.975737	0.038745
CG11454	FBgn0031224	0.976318	0.0384214
CG12746	FBgn0037341	0.984202	0.0366099
CG13218	FBgn0033587	0.987923	0.0440034
CG1161	FBgn0037313	0.990591	0.0276917
CG11127	FBgn0033178	0.99175	0.0289324
CG31344	FBgn0051344	0.992571	0.0499404
PGAP3	FBgn0033088	0.993684	0.0355451
COX5B	FBgn0031830	0.996768	0.0251988
CG4045	FBgn0025629	0.997343	0.0229699
lncRNA:CR44733	FBgn0265946	1.00606	0.0282765
CG4743	FBgn0039357	1.01539	0.0346337
CG12173	FBgn0037305	1.02069	0.0362039
PIG-P	FBgn0039405	1.02111	0.0265815
Tcs6	FBgn0260224	1.02111	0.0265815
Gmd	FBgn0031661	1.0225	0.0300767
snmRNA:838	FBgn0065081	1.02486	0.0291198
CG6013	FBgn0038675	1.02529	0.0370528
Nfs1	FBgn0032393	1.03299	0.0384497
alpha-PheRS	FBgn0030007	1.03696	0.0262039
CG31211	FBgn0051211	1.04177	0.0410392
Nuf2	FBgn0031886	1.04649	0.0267291
Bet5	FBgn0260860	1.04679	0.0494549
Rpt1	FBgn0028687	1.05488	0.0400114
CG14005	FBgn0031739	1.05826	0.0229302
Cmpk	FBgn0028833	1.05874	0.0165957
SLIRP2	FBgn0037602	1.06031	0.0258717
CG30094	FBgn0050094	1.0604	0.0430011
Naa60	FBgn0036039	1.0618	0.0383419
mRRF1	FBgn0035980	1.06478	0.0331062
Pex11c	FBgn0039068	1.06578	0.0264367
Mtap	FBgn0034215	1.06632	0.0312237
Sc2	FBgn0035471	1.06693	0.0235605
CG6171	FBgn0026737	1.06761	0.0348751
asRNA:CR44321	FBgn0265380	1.07337	0.0362862
p47	FBgn0033179	1.07548	0.0217916
CG34232	FBgn0085261	1.09652	0.0391766
lncRNA:CR45005	FBgn0266357	1.10192	0.0413998
CG43445	FBgn0263399	1.1064	0.0353606
holn1	FBgn0032250	1.1129	0.0372288
CG1598	FBgn0033191	1.11521	0.0368228
PTPMT1	FBgn0039111	1.11699	0.0228223
CG7182	FBgn0035878	1.11714	0.0401704
Ciao1	FBgn0033972	1.11978	0.028109
CG1236	FBgn0037370	1.1205	0.0240801
CG31855	FBgn0051855	1.12247	0.016979
Pex13	FBgn0033812	1.12811	0.025406
rush	FBgn0025381	1.12997	0.0281175
Ufd1-like	FBgn0036136	1.14017	0.0164509
mir-184	FBgn0262391	1.14531	0.0239125
trus	FBgn0038055	1.14588	0.0376945
CG1265	FBgn0035517	1.16309	0.0168257
mir-2501	FBgn0262442	1.16618	0.0398921
CG14480	FBgn0034242	1.16785	0.0140744
asRNA:CR46105	FBgn0267774	1.1867	0.0395713
P32	FBgn0034259	1.1887	0.0268597
tRNA:Ser-CGA-1-1	FBgn0011975	1.1957	0.044046
CG16890	FBgn0028932	1.19793	0.0406332
CG14054	FBgn0029596	1.1984	0.027439
Vta1	FBgn0035251	1.19942	0.0257212
asRNA:CR45445	FBgn0266994	1.20248	0.0116894
lncRNA:CR45597	FBgn0267157	1.21104	0.0225241
CG12929	FBgn0033429	1.22403	0.0181374
CG14407	FBgn0030584	1.23217	0.0239466
CG13369	FBgn0025640	1.24324	0.0217462
Vps37B	FBgn0037299	1.24923	0.0221522
EMC6	FBgn0039259	1.25357	0.0443271
CG17359	FBgn0036396	1.25596	0.0112408
senju	FBgn0031676	1.25676	0.0260619
CR43361	FBgn0263093	1.2594	0.0328904
asRNA:CR44031	FBgn0264823	1.26183	0.0116269
Cyt-b5	FBgn0264294	1.26235	0.019699
CG9154	FBgn0031777	1.26448	0.021184
CG8891	FBgn0031663	1.26773	0.0192845
mRpL9	FBgn0038319	1.27366	0.0138018
lncRNA:CR44339	FBgn0265427	1.27518	0.047845
CG12824	FBgn0033222	1.28116	0.03113
Pisd	FBgn0026576	1.2873	0.022615
mod	FBgn0002780	1.29744	0.0246281
asRNA:CR44381	FBgn0265531	1.30273	0.0246082
PIG-F	FBgn0036893	1.30462	0.0253521
CG31525	FBgn0051525	1.31132	0.0359483
CG8043	FBgn0037610	1.32555	0.0333589
CG33785	FBgn0061362	1.35872	0.0315417
Tcs1	FBgn0061361	1.35872	0.0315417
CG7791	FBgn0033038	1.36122	0.0160136
NitFhit	FBgn0024945	1.37221	0.0150738
CG44249	FBgn0265184	1.37775	0.0298722
JTBR	FBgn0025820	1.39044	0.0258489
Ercc1	FBgn0028434	1.41656	0.0159881
CG18547	FBgn0037973	1.42139	0.0352271
CG2021	FBgn0035271	1.44529	0.0105764
mir-4970	FBgn0263528	1.46466	0.021803
Taf10	FBgn0028398	1.49778	0.0124446
snoRNA:Tudor-SN-a	FBgn0263470	1.51316	0.00881034
PIG-V	FBgn0265174	1.53686	0.0250398
ox	FBgn0011227	1.55176	0.0122345
PolD2	FBgn0027903	1.57834	0.0129557
RpLP2	FBgn0003274	1.59151	0.00754401
CG12310	FBgn0036467	1.64374	0.0275213
CG7386	FBgn0035691	1.64798	0.0178904
l(3)87Df	FBgn0002354	1.72154	0.0138189
Spn55B	FBgn0028983	1.76478	0.0081573
CG11077	FBgn0039930	1.87054	0.0023992
CG8152	FBgn0034008	1.8767	0.00637422
DCTN4-p62	FBgn0033206	1.88693	0.0169705
lncRNA:CR46110	FBgn0267779	1.9183	0.00454571
CG18581	FBgn0036466	3.08726	0.00536343
