# Supplementary material for: A KDM5–Prospero transcriptional axis functions during early neurodevelopment to regulate mushroom body formation
Source: eLife journal article supplement (doi:10.7554/elife.63886), 2021-03-17
Supplement: supp [file elife-63886-supp-v1.zip › elife_poa_e63886_Supplementary_file_2.xlsx]

## Sheet: 140
GO biological process complete	Drosophila melanogaster - REFLIST (13781)	kdm5_140 (228)	kdm5_140 (expected)	kdm5_140(over/under)	kdm5_140 (fold Enrichment)	kdm5_140 (raw P-value)	kdm5_140 (FDR)
exonucleolytic trimming to generate mature 3'-end of 5.8S rRNA from tricistronic rRNA transcript (SSU-rRNA, 5.8S rRNA, LSU-rRNA) (GO:0000467)	6	3	0.1	+	30.22	0.000332	0.0148
exonucleolytic trimming involved in rRNA processing (GO:0000459)	6	3	0.1	+	30.22	0.000332	0.0147
rRNA 3'-end processing (GO:0031125)	8	4	0.13	+	30.22	3.05e-05	0.00194
ganglion mother cell fate determination (GO:0007402)	8	4	0.13	+	30.22	3.05e-05	0.00192
RNA phosphodiester bond hydrolysis, exonucleolytic (GO:0090503)	8	3	0.13	+	22.67	0.000637	0.0248
negative regulation of axonogenesis (GO:0050771)	9	3	0.15	+	20.15	0.00084	0.0316
histoblast morphogenesis (GO:0007488)	12	4	0.2	+	20.15	0.000107	0.00574
regulation of axon extension involved in axon guidance (GO:0048841)	10	3	0.17	+	18.13	0.00108	0.0398
maturation of 5.8S rRNA from tricistronic rRNA transcript (SSU-rRNA, 5.8S rRNA, LSU-rRNA) (GO:0000466)	18	4	0.3	+	13.43	0.000397	0.0171
nucleosome assembly (GO:0006334)	34	7	0.56	+	12.44	3.87e-06	0.000317
stem cell fate determination (GO:0048867)	31	6	0.51	+	11.7	2.65e-05	0.00172
cleavage involved in rRNA processing (GO:0000469)	22	4	0.36	+	10.99	0.000771	0.0293
heterochromatin organization involved in chromatin silencing (GO:0070868)	29	5	0.48	+	10.42	0.000207	0.0101
regulation of neural precursor cell proliferation (GO:2000177)	58	10	0.96	+	10.42	1.36e-07	1.53e-05
chromatin assembly (GO:0031497)	41	7	0.68	+	10.32	1.15e-05	0.000838
neuroblast fate commitment (GO:0014017)	30	5	0.5	+	10.07	0.000238	0.0112
neuroblast fate determination (GO:0007400)	25	4	0.41	+	9.67	0.00118	0.0429
stem cell fate commitment (GO:0048865)	39	6	0.65	+	9.3	8.34e-05	0.00465
cytochrome complex assembly (GO:0017004)	26	4	0.43	+	9.3	0.00134	0.0478
antennal development (GO:0007469)	26	4	0.43	+	9.3	0.00134	0.0476
chromatin assembly or disassembly (GO:0006333)	46	7	0.76	+	9.2	2.25e-05	0.00151
asymmetric neuroblast division (GO:0055059)	42	6	0.69	+	8.63	0.000121	0.00632
neuroblast division (GO:0055057)	44	6	0.73	+	8.24	0.000152	0.00781
neuroblast differentiation (GO:0014016)	45	6	0.74	+	8.06	0.00017	0.00851
heterochromatin organization (GO:0070828)	39	5	0.65	+	7.75	0.000708	0.0271
stem cell proliferation (GO:0072089)	64	8	1.06	+	7.56	2.13e-05	0.00144
eye-antennal disc development (GO:0035214)	65	8	1.08	+	7.44	2.36e-05	0.00157
cytoplasmic translation (GO:0002181)	115	13	1.9	+	6.83	1.62e-07	1.79e-05
regulation of axonogenesis (GO:0050770)	63	7	1.04	+	6.72	0.000138	0.00716
neural precursor cell proliferation (GO:0061351)	55	6	0.91	+	6.59	0.000458	0.0187
neuroblast proliferation (GO:0007405)	55	6	0.91	+	6.59	0.000458	0.0186
nucleosome organization (GO:0034728)	76	8	1.26	+	6.36	6.55e-05	0.00385
brain development (GO:0007420)	116	12	1.92	+	6.25	1.16e-06	0.000103
negative regulation of cell differentiation (GO:0045596)	102	10	1.69	+	5.93	1.42e-05	0.00101
chromatin organization involved in regulation of transcription (GO:0034401)	83	8	1.37	+	5.83	0.000116	0.00612
mushroom body development (GO:0016319)	73	7	1.21	+	5.8	0.00032	0.0144
head development (GO:0060322)	138	13	2.28	+	5.69	1.1e-06	9.85e-05
central nervous system development (GO:0007417)	266	25	4.4	+	5.68	1.04e-11	4.08e-09
asymmetric stem cell division (GO:0098722)	64	6	1.06	+	5.67	0.000957	0.0358
stem cell differentiation (GO:0048863)	75	7	1.24	+	5.64	0.000372	0.0163
chromatin organization involved in negative regulation of transcription (GO:0097549)	76	7	1.26	+	5.57	0.000401	0.0171
chromatin silencing (GO:0006342)	76	7	1.26	+	5.57	0.000401	0.017
negative regulation of gene expression, epigenetic (GO:0045814)	76	7	1.26	+	5.57	0.000401	0.017
ventral cord development (GO:0007419)	77	7	1.27	+	5.49	0.000432	0.0179
protein-DNA complex assembly (GO:0065004)	78	7	1.29	+	5.42	0.000464	0.0188
asymmetric cell division (GO:0008356)	103	9	1.7	+	5.28	8.79e-05	0.00483
cell fate determination (GO:0001709)	139	12	2.3	+	5.22	6.62e-06	0.000525
cell population proliferation (GO:0008283)	122	10	2.02	+	4.95	5.91e-05	0.00352
neuron fate commitment (GO:0048663)	86	7	1.42	+	4.92	0.000798	0.0302
stem cell division (GO:0017145)	91	7	1.51	+	4.65	0.00109	0.04
DNA packaging (GO:0006323)	104	8	1.72	+	4.65	0.000484	0.0192
regulation of cell population proliferation (GO:0042127)	222	17	3.67	+	4.63	3.78e-07	3.86e-05
regulation of cell morphogenesis involved in differentiation (GO:0010769)	94	7	1.56	+	4.5	0.0013	0.0468
transcription by RNA polymerase II (GO:0006366)	111	8	1.84	+	4.36	0.000725	0.0277
protein-DNA complex subunit organization (GO:0071824)	127	9	2.1	+	4.28	0.000383	0.0166
negative regulation of RNA biosynthetic process (GO:1902679)	370	26	6.12	+	4.25	1.46e-09	3.11e-07
negative regulation of transcription, DNA-templated (GO:0045892)	370	26	6.12	+	4.25	1.46e-09	3.03e-07
negative regulation of nucleic acid-templated transcription (GO:1903507)	370	26	6.12	+	4.25	1.46e-09	2.95e-07
negative regulation of RNA metabolic process (GO:0051253)	389	27	6.44	+	4.2	8.9e-10	2.06e-07
translation (GO:0006412)	303	21	5.01	+	4.19	7.58e-08	9.93e-06
DNA conformation change (GO:0071103)	130	9	2.15	+	4.18	0.000449	0.0185
peptide biosynthetic process (GO:0043043)	308	21	5.1	+	4.12	9.83e-08	1.17e-05
negative regulation of transcription by RNA polymerase II (GO:0000122)	223	15	3.69	+	4.07	8.24e-06	0.000629
regulation of neurogenesis (GO:0050767)	268	18	4.43	+	4.06	1.03e-06	9.3e-05
negative regulation of nucleobase-containing compound metabolic process (GO:0045934)	405	27	6.7	+	4.03	2.03e-09	3.99e-07
negative regulation of macromolecule biosynthetic process (GO:0010558)	438	28	7.25	+	3.86	2.4e-09	4.6e-07
negative regulation of cellular macromolecule biosynthetic process (GO:2000113)	438	28	7.25	+	3.86	2.4e-09	4.49e-07
amide biosynthetic process (GO:0043604)	337	21	5.58	+	3.77	4.03e-07	4.01e-05
regulation of cell differentiation (GO:0045595)	421	26	6.97	+	3.73	1.82e-08	2.7e-06
negative regulation of cellular biosynthetic process (GO:0031327)	454	28	7.51	+	3.73	5.06e-09	8.46e-07
negative regulation of biosynthetic process (GO:0009890)	454	28	7.51	+	3.73	5.06e-09	8.28e-07
nucleic acid-templated transcription (GO:0097659)	179	11	2.96	+	3.71	0.000283	0.0131
transcription, DNA-templated (GO:0006351)	179	11	2.96	+	3.71	0.000283	0.013
cell division (GO:0051301)	247	15	4.09	+	3.67	2.57e-05	0.0017
positive regulation of transcription by RNA polymerase II (GO:0045944)	346	21	5.72	+	3.67	6.06e-07	5.74e-05
RNA biosynthetic process (GO:0032774)	182	11	3.01	+	3.65	0.000323	0.0145
regulation of cell development (GO:0060284)	351	21	5.81	+	3.62	7.55e-07	6.9e-05
regulation of transcription by RNA polymerase II (GO:0006357)	745	44	12.33	+	3.57	4.24e-13	1.96e-10
cell fate commitment (GO:0045165)	305	18	5.05	+	3.57	5.75e-06	0.000461
positive regulation of macromolecule biosynthetic process (GO:0010557)	515	30	8.52	+	3.52	4.77e-09	8.15e-07
negative regulation of developmental process (GO:0051093)	191	11	3.16	+	3.48	0.000476	0.019
regulation of RNA biosynthetic process (GO:2001141)	1153	66	19.08	+	3.46	4.39e-19	5.75e-16
regulation of transcription, DNA-templated (GO:0006355)	1153	66	19.08	+	3.46	4.39e-19	4.93e-16
regulation of nucleic acid-templated transcription (GO:1903506)	1153	66	19.08	+	3.46	4.39e-19	4.31e-16
positive regulation of RNA biosynthetic process (GO:1902680)	457	26	7.56	+	3.44	8.63e-08	1.11e-05
positive regulation of transcription, DNA-templated (GO:0045893)	457	26	7.56	+	3.44	8.63e-08	1.09e-05
positive regulation of nucleic acid-templated transcription (GO:1903508)	457	26	7.56	+	3.44	8.63e-08	1.08e-05
negative regulation of gene expression (GO:0010629)	566	32	9.36	+	3.42	2.77e-09	4.94e-07
positive regulation of cellular biosynthetic process (GO:0031328)	556	31	9.2	+	3.37	6.87e-09	1.1e-06
positive regulation of biosynthetic process (GO:0009891)	556	31	9.2	+	3.37	6.87e-09	1.08e-06
peptide metabolic process (GO:0006518)	400	22	6.62	+	3.32	1.54e-06	0.000132
positive regulation of nucleobase-containing compound metabolic process (GO:0045935)	494	27	8.17	+	3.3	1.04e-07	1.2e-05
regulation of cellular macromolecule biosynthetic process (GO:2000112)	1318	72	21.81	+	3.3	7.42e-20	5.84e-16
segmentation (GO:0035282)	220	12	3.64	+	3.3	0.000423	0.0176
neuron projection guidance (GO:0097485)	275	15	4.55	+	3.3	8.22e-05	0.00462
regulation of macromolecule biosynthetic process (GO:0010556)	1324	72	21.9	+	3.29	9.49e-20	3.73e-16
regulation of RNA metabolic process (GO:0051252)	1292	70	21.38	+	3.27	4.53e-19	3.95e-16
positive regulation of RNA metabolic process (GO:0051254)	480	26	7.94	+	3.27	2.15e-07	2.31e-05
regulation of nucleobase-containing compound metabolic process (GO:0019219)	1330	72	22	+	3.27	1.21e-19	3.17e-16
chromatin organization (GO:0006325)	357	19	5.91	+	3.22	1.28e-05	0.000921
regulation of cellular biosynthetic process (GO:0031326)	1372	73	22.7	+	3.22	1.57e-19	3.08e-16
regulation of biosynthetic process (GO:0009889)	1376	73	22.77	+	3.21	1.83e-19	2.88e-16
chemotaxis (GO:0006935)	284	15	4.7	+	3.19	0.000116	0.00614
cellular macromolecule biosynthetic process (GO:0034645)	777	41	12.86	+	3.19	8.76e-11	2.87e-08
regulation of nervous system development (GO:0051960)	363	19	6.01	+	3.16	1.59e-05	0.00111
positive regulation of gene expression (GO:0010628)	556	29	9.2	+	3.15	8.72e-08	1.05e-05
sensory organ development (GO:0007423)	461	24	7.63	+	3.15	1.27e-06	0.000111
cellular nitrogen compound biosynthetic process (GO:0044271)	750	39	12.41	+	3.14	4.08e-10	1.11e-07
macromolecule biosynthetic process (GO:0009059)	796	41	13.17	+	3.11	1.77e-10	5.35e-08
negative regulation of nitrogen compound metabolic process (GO:0051172)	602	31	9.96	+	3.11	3.94e-08	5.34e-06
compound eye development (GO:0048749)	345	17	5.71	+	2.98	9.16e-05	0.005
regulation of gene expression (GO:0010468)	1567	77	25.93	+	2.97	9.56e-19	7.51e-16
axon guidance (GO:0007411)	266	13	4.4	+	2.95	0.000663	0.0257
negative regulation of cellular metabolic process (GO:0031324)	660	31	10.92	+	2.84	2.79e-07	2.96e-05
imaginal disc development (GO:0007444)	555	26	9.18	+	2.83	2.91e-06	0.000243
epithelial tube morphogenesis (GO:0060562)	470	22	7.78	+	2.83	1.79e-05	0.00123
tube morphogenesis (GO:0035239)	514	24	8.5	+	2.82	7.57e-06	0.000589
taxis (GO:0042330)	344	16	5.69	+	2.81	0.000275	0.0128
neuron projection morphogenesis (GO:0048812)	409	19	6.77	+	2.81	7.49e-05	0.0043
cell projection morphogenesis (GO:0048858)	410	19	6.78	+	2.8	7.73e-05	0.0044
plasma membrane bounded cell projection morphogenesis (GO:0120039)	410	19	6.78	+	2.8	7.73e-05	0.00437
positive regulation of nitrogen compound metabolic process (GO:0051173)	777	36	12.86	+	2.8	3.73e-08	5.24e-06
neuron projection development (GO:0031175)	432	20	7.15	+	2.8	5.05e-05	0.00308
eye development (GO:0001654)	368	17	6.09	+	2.79	0.000192	0.00954
visual system development (GO:0150063)	368	17	6.09	+	2.79	0.000192	0.00948
sensory system development (GO:0048880)	368	17	6.09	+	2.79	0.000192	0.00943
negative regulation of macromolecule metabolic process (GO:0010605)	736	34	12.18	+	2.79	1.01e-07	1.18e-05
cellular amide metabolic process (GO:0043603)	482	22	7.97	+	2.76	2.58e-05	0.00169
nucleobase-containing compound biosynthetic process (GO:0034654)	373	17	6.17	+	2.75	0.000223	0.0106
post-embryonic animal organ development (GO:0048569)	461	21	7.63	+	2.75	4.08e-05	0.00251
cell part morphogenesis (GO:0032990)	418	19	6.92	+	2.75	9.85e-05	0.00534
regulation of nitrogen compound metabolic process (GO:0051171)	1848	84	30.57	+	2.75	1.32e-18	9.43e-16
generation of neurons (GO:0048699)	860	39	14.23	+	2.74	1.61e-08	2.44e-06
tube development (GO:0035295)	708	32	11.71	+	2.73	3.99e-07	4.02e-05
post-embryonic animal organ morphogenesis (GO:0048563)	399	18	6.6	+	2.73	0.000165	0.00836
imaginal disc morphogenesis (GO:0007560)	399	18	6.6	+	2.73	0.000165	0.0083
regulation of primary metabolic process (GO:0080090)	1869	84	30.92	+	2.72	2.61e-18	1.71e-15
axonogenesis (GO:0007409)	314	14	5.19	+	2.69	0.000979	0.0365
cell morphogenesis involved in neuron differentiation (GO:0048667)	407	18	6.73	+	2.67	0.000208	0.0101
nervous system development (GO:0007399)	1063	47	17.59	+	2.67	8.78e-10	2.09e-07
cellular protein-containing complex assembly (GO:0034622)	386	17	6.39	+	2.66	0.000327	0.0146
positive regulation of cellular metabolic process (GO:0031325)	842	37	13.93	+	2.66	8.64e-08	1.06e-05
regulation of developmental process (GO:0050793)	754	33	12.47	+	2.65	5.17e-07	4.96e-05
regionalization (GO:0003002)	458	20	7.58	+	2.64	0.000109	0.00582
neurogenesis (GO:0022008)	902	39	14.92	+	2.61	5.52e-08	7.36e-06
negative regulation of metabolic process (GO:0009892)	788	34	13.04	+	2.61	4.66e-07	4.52e-05
axon development (GO:0061564)	325	14	5.38	+	2.6	0.00134	0.0479
neuron differentiation (GO:0030182)	697	30	11.53	+	2.6	2.5e-06	0.000211
positive regulation of macromolecule metabolic process (GO:0010604)	817	35	13.52	+	2.59	3.63e-07	3.76e-05
neuron development (GO:0048666)	561	24	9.28	+	2.59	3e-05	0.00193
instar larval or pupal morphogenesis (GO:0048707)	446	19	7.38	+	2.57	0.00022	0.0105
cellular biosynthetic process (GO:0044249)	1268	54	20.98	+	2.57	1.33e-10	4.2e-08
cell morphogenesis involved in differentiation (GO:0000904)	449	19	7.43	+	2.56	0.000238	0.0113
regulation of macromolecule metabolic process (GO:0060255)	2010	85	33.25	+	2.56	5.72e-17	3.46e-14
metamorphosis (GO:0007552)	473	20	7.83	+	2.56	0.000165	0.00841
gene expression (GO:0010467)	1094	46	18.1	+	2.54	9.69e-09	1.49e-06
animal organ development (GO:0048513)	1166	49	19.29	+	2.54	2.7e-09	4.94e-07
regulation of cellular metabolic process (GO:0031323)	1983	83	32.81	+	2.53	4.11e-16	2.15e-13
protein-containing complex assembly (GO:0065003)	412	17	6.82	+	2.49	0.000666	0.0257
biosynthetic process (GO:0009058)	1333	55	22.05	+	2.49	3.07e-10	8.95e-08
organic substance biosynthetic process (GO:1901576)	1286	53	21.28	+	2.49	7.44e-10	1.83e-07
aromatic compound biosynthetic process (GO:0019438)	437	18	7.23	+	2.49	0.000473	0.019
regulation of multicellular organismal development (GO:2000026)	583	24	9.65	+	2.49	5.39e-05	0.00326
system development (GO:0048731)	1677	69	27.75	+	2.49	6.87e-13	3e-10
post-embryonic animal morphogenesis (GO:0009886)	462	19	7.64	+	2.49	0.000336	0.0147
positive regulation of metabolic process (GO:0009893)	911	37	15.07	+	2.45	6.67e-07	6.25e-05
heterocycle biosynthetic process (GO:0018130)	444	18	7.35	+	2.45	0.000566	0.0221
organonitrogen compound biosynthetic process (GO:1901566)	766	31	12.67	+	2.45	7.05e-06	0.000554
post-embryonic development (GO:0009791)	619	25	10.24	+	2.44	7.04e-05	0.0041
regulation of multicellular organismal process (GO:0051239)	771	31	12.76	+	2.43	7.69e-06	0.000593
pattern specification process (GO:0007389)	499	20	8.26	+	2.42	0.000493	0.0195
regulation of metabolic process (GO:0019222)	2176	86	36	+	2.39	1.98e-15	9.72e-13
cell morphogenesis (GO:0000902)	508	20	8.4	+	2.38	0.000548	0.0216
chromosome organization (GO:0051276)	559	22	9.25	+	2.38	0.000266	0.0124
tissue morphogenesis (GO:0048729)	609	23	10.08	+	2.28	0.000287	0.0131
cellular component morphogenesis (GO:0032989)	636	24	10.52	+	2.28	0.00021	0.0101
morphogenesis of an epithelium (GO:0002009)	591	22	9.78	+	2.25	0.000468	0.0189
positive regulation of cellular process (GO:0048522)	1458	54	24.12	+	2.24	1.83e-08	2.66e-06
protein-containing complex subunit organization (GO:0043933)	513	19	8.49	+	2.24	0.00127	0.046
cellular nitrogen compound metabolic process (GO:0034641)	1768	65	29.25	+	2.22	5.12e-10	1.34e-07
instar larval or pupal development (GO:0002165)	551	20	9.12	+	2.19	0.00114	0.0416
epithelium development (GO:0060429)	948	34	15.68	+	2.17	3.21e-05	0.002
cell differentiation (GO:0030154)	1622	58	26.84	+	2.16	2.23e-08	3.19e-06
animal organ morphogenesis (GO:0009887)	729	26	12.06	+	2.16	0.000289	0.0131
negative regulation of cellular process (GO:0048523)	1224	43	20.25	+	2.12	3.38e-06	0.00028
cellular developmental process (GO:0048869)	1664	58	27.53	+	2.11	3.88e-08	5.35e-06
anatomical structure morphogenesis (GO:0009653)	1470	51	24.32	+	2.1	4.43e-07	4.35e-05
positive regulation of biological process (GO:0048518)	1641	56	27.15	+	2.06	1.7e-07	1.86e-05
nucleic acid metabolic process (GO:0090304)	1085	37	17.95	+	2.06	3.47e-05	0.00215
RNA metabolic process (GO:0016070)	829	28	13.72	+	2.04	0.000399	0.0171
germ cell development (GO:0007281)	711	24	11.76	+	2.04	0.00131	0.0471
tissue development (GO:0009888)	1037	35	17.16	+	2.04	7.25e-05	0.00419
cellular macromolecule metabolic process (GO:0044260)	2228	75	36.86	+	2.03	7.08e-10	1.8e-07
nucleobase-containing compound metabolic process (GO:0006139)	1348	45	22.3	+	2.02	9.12e-06	0.000683
cell development (GO:0048468)	1290	43	21.34	+	2.01	1.12e-05	0.000822
multicellular organism development (GO:0007275)	2287	76	37.84	+	2.01	1.01e-09	2.27e-07
negative regulation of biological process (GO:0048519)	1417	47	23.44	+	2	5.08e-06	0.000411
cellular component biogenesis (GO:0044085)	1150	38	19.03	+	2	5.6e-05	0.00336
cellular component assembly (GO:0022607)	988	32	16.35	+	1.96	0.000413	0.0174
heterocycle metabolic process (GO:0046483)	1428	46	23.63	+	1.95	1.56e-05	0.0011
cellular aromatic compound metabolic process (GO:0006725)	1472	47	24.35	+	1.93	1.29e-05	0.000923
developmental process involved in reproduction (GO:0003006)	885	28	14.64	+	1.91	0.00106	0.0393
developmental process (GO:0032502)	2758	87	45.63	+	1.91	3.88e-10	1.09e-07
anatomical structure development (GO:0048856)	2633	82	43.56	+	1.88	3.14e-09	5.49e-07
organic cyclic compound metabolic process (GO:1901360)	1525	47	25.23	+	1.86	3.03e-05	0.00194
regulation of cellular process (GO:0050794)	3585	109	59.31	+	1.84	3.22e-12	1.33e-09
organelle organization (GO:0006996)	1725	52	28.54	+	1.82	1.98e-05	0.00135
cellular protein metabolic process (GO:0044267)	1663	49	27.51	+	1.78	6.14e-05	0.00363
regulation of biological process (GO:0050789)	3890	112	64.36	+	1.74	5.76e-11	1.97e-08
cellular component organization or biogenesis (GO:0071840)	2754	79	45.56	+	1.73	2.89e-07	3.03e-05
cellular component organization (GO:0016043)	2608	74	43.15	+	1.72	1.5e-06	0.00013
biological regulation (GO:0065007)	4351	117	71.99	+	1.63	1.04e-09	2.26e-07
multicellular organismal process (GO:0032501)	3459	92	57.23	+	1.61	6.79e-07	6.28e-05
cellular metabolic process (GO:0044237)	3921	103	64.87	+	1.59	1.17e-07	1.34e-05
cellular process (GO:0009987)	6632	172	109.72	+	1.57	1.15e-16	6.43e-14
macromolecule metabolic process (GO:0043170)	3269	84	54.08	+	1.55	1.04e-05	0.000768
nitrogen compound metabolic process (GO:0006807)	3726	93	61.64	+	1.51	8.47e-06	0.00064
primary metabolic process (GO:0044238)	3971	94	65.7	+	1.43	8.72e-05	0.00483
organic substance metabolic process (GO:0071704)	4311	99	71.32	+	1.39	0.000132	0.00687
metabolic process (GO:0008152)	4712	104	77.96	+	1.33	0.000422	0.0176
biological_process (GO:0008150)	11180	219	184.97	+	1.18	4.48e-11	1.68e-08
Unclassified (UNCLASSIFIED)	2601	9	43.03	-	0.21	4.48e-11	1.6e-08
