# Supplementary material for: A KDM5–Prospero transcriptional axis functions during early neurodevelopment to regulate mushroom body formation
Source: eLife journal article supplement (doi:10.7554/elife.63886), 2021-03-17
Supplement: supp [file elife-63886-supp-v1.zip › elife_poa_e63886_Supplementary_file_3.xlsx]

## Sheet: Sheet1
gene name	FBID_KEY_140	M (log2FC)_RNAi	FDR
lncRNA:CR44272	FBgn0265299	-7.49567	0.000123036
snoRNA:lola-a	FBgn0263466	-6.8057	0.0001325
bou	FBgn0261284	-6.68608	0.00028393
lncRNA:CR45695	FBgn0267259	-6.59144	0.000302858
lncRNA:CR44862	FBgn0266156	-6.06976	0.00147643
E(spl)m8-HLH	FBgn0000591	-5.99669	0.000530002
mir-954	FBgn0262302	-5.68408	0.00165626
asRNA:CR45396	FBgn0266945	-5.5672	0.000501609
lncRNA:CR44700	FBgn0265911	-5.56314	0.00268787
lncRNA:CR44446	FBgn0265639	-5.46022	0.00287715
lncRNA:CR46098	FBgn0267767	-5.44531	0.00123036
lncRNA:CR43635	FBgn0263626	-5.42256	0.000785539
Pcd	FBgn0024841	-5.37212	0.00160893
lncRNA:CR45744	FBgn0267308	-5.23415	0.0024134
lncRNA:CR45115	FBgn0266590	-5.22394	0.00282037
lncRNA:CR45688	FBgn0267248	-5.08488	0.00433466
lncRNA:CR44983	FBgn0266318	-5.0335	0.00361537
asRNA:CR44027	FBgn0264819	-5.0157	0.00083286
snoRNA:U3:54Ab	FBgn0065047	-4.999	0.00105054
E(spl)mgamma-HLH	FBgn0002735	-4.96895	0.00240394
snRNA:U1:95Ca	FBgn0004185	-4.9139	0.000662502
lncRNA:CR44861	FBgn0266155	-4.89926	0.00291501
lncRNA:CR44121	FBgn0264952	-4.89512	0.00314215
snRNA:U11	FBgn0083987	-4.89492	0.00134393
asRNA:CR45611	FBgn0267171	-4.88527	0.000927503
lncRNA:CR45566	FBgn0267126	-4.87022	0.00123983
mir-279	FBgn0262448	-4.86848	0.00249858
lncRNA:CR46110	FBgn0267779	-4.80358	0.00287715
asRNA:CR46145	FBgn0267820	-4.76868	0.00150483
asRNA:CR44873	FBgn0266167	-4.7021	0.00152376
E(spl)m7-HLH	FBgn0002633	-4.66625	0.00145751
lncRNA:CR45593	FBgn0267153	-4.65416	0.00166572
snoRNA:Me28S-C3227b	FBgn0082939	-4.62996	0.00205376
snoRNA:Me28S-U1848	FBgn0082926	-4.62996	0.00205376
lncRNA:CR45480	FBgn0267036	-4.62686	0.000908575
snRNA:U1:21D	FBgn0003916	-4.61109	0.000955896
lncRNA:CR44033	FBgn0264825	-4.5936	0.00316108
lncRNA:CR44772	FBgn0265997	-4.55128	0.000955896
nerfin-1	FBgn0028999	-4.53223	0.00147643
insb	FBgn0034224	-4.51671	0.00160893
lncRNA:CR45698	FBgn0267262	-4.51592	0.00141018
Hsp23	FBgn0001224	-4.49683	0.001325
RpS28a	FBgn0039739	-4.4327	0.00229037
tRNA:Thr-CGT-1-2	FBgn0051334	-4.39899	0.00359644
lncRNA:acal	FBgn0283426	-4.38382	0.00164679
CG14312	FBgn0038596	-4.29921	0.0022809
lncRNA:CR44120	FBgn0264951	-4.24395	0.00459019
lncRNA:CR45439	FBgn0266988	-4.21313	0.00489305
snRNA:U2:34ABa	FBgn0004191	-4.12288	0.00361537
lncRNA:CR43435	FBgn0263383	-4.0924	0.00300965
E(spl)mbeta-HLH	FBgn0002733	-4.08924	0.0044293
KP78a	FBgn0026064	-4.07072	0.00299072
KP78b	FBgn0026063	-4.07072	0.00299072
lncRNA:CR46147	FBgn0267826	-4.02745	0.00295287
lncRNA:CR45810	FBgn0267460	-4.00561	0.00521484
ase	FBgn0000137	-3.97713	0.00277305
snmRNA:204	FBgn0065101	-3.93576	0.00176983
lncRNA:CR45624	FBgn0267184	-3.921	0.00681431
lncRNA:CR45407	FBgn0266956	-3.90466	0.00519591
lncRNA:CR44411	FBgn0265584	-3.88543	0.00180769
CG32625	FBgn0052625	-3.88034	0.00318001
hoip	FBgn0286786	-3.85065	0.00218626
Hey	FBgn0027788	-3.81047	0.0072402
lncRNA:CR43700	FBgn0263838	-3.76861	0.00388984
snRNA:U1:82Eb	FBgn0004183	-3.74502	0.00368162
asRNA:CR45135	FBgn0266628	-3.73937	0.00177929
lncRNA:CR31451	FBgn0051451	-3.72705	0.00342608
snoRNA:lola-b	FBgn0263481	-3.70494	0.00511073
CG13896	FBgn0035159	-3.68841	0.00559341
lncRNA:CR46056	FBgn0267723	-3.67169	0.00514859
lncRNA:CR45556	FBgn0267116	-3.64656	0.00694681
snRNA:U1:95Cc	FBgn0004187	-3.63601	0.00428734
Calr	FBgn0005585	-3.62636	0.00337876
mir-4978	FBgn0263539	-3.60623	0.00396555
icln	FBgn0029079	-3.59977	0.00523377
RpS30	FBgn0038834	-3.58378	0.00409805
asRNA:CR45210	FBgn0266737	-3.56293	0.00406019
tap	FBgn0015550	-3.5464	0.010354
lncRNA:roX2	FBgn0019660	-3.49472	0.0065777
Dpy-30L1	FBgn0032293	-3.48663	0.00451448
Ama	FBgn0000071	-3.46419	0.00565966
lncRNA:CR45911	FBgn0267571	-3.45439	0.00276358
emc	FBgn0000575	-3.45235	0.00357751
tRNA:Pro-AGG-1-5	FBgn0052129	-3.43318	0.0429775
snoRNA:lola-c	FBgn0263482	-3.43316	0.00781753
SNRPG	FBgn0261791	-3.41333	0.00520538
lncRNA:CR45233	FBgn0266768	-3.40289	0.00432519
snoRNA:Me28S-A1322	FBgn0015543	-3.34764	0.00291501
wor	FBgn0001983	-3.33992	0.00824342
CG44242	FBgn0265177	-3.28993	0.00298126
Act5C	FBgn0000042	-3.28214	0.00382359
ocn	FBgn0041102	-3.2798	0.0189192
cas	FBgn0004878	-3.27831	0.00973878
snoRNA:Me18S-A425	FBgn0086056	-3.26958	0.00354912
CG32182	FBgn0052182	-3.26221	0.00782699
lncRNA:CR45430	FBgn0266979	-3.26211	0.00652092
dap	FBgn0010316	-3.24037	0.00730645
CG15535	FBgn0039764	-3.23682	0.00449555
lncRNA:CR43298	FBgn0262990	-3.2333	0.0141397
asRNA:CR44431	FBgn0265613	-3.22511	0.00664395
mir-13b-1	FBgn0262367	-3.19796	0.00816771
Bka	FBgn0010520	-3.19763	0.0064452
CG43116	FBgn0262576	-3.1927	0.0127768
lncRNA:CR43306	FBgn0262998	-3.18143	0.0300492
CG30385	FBgn0050385	-3.17776	0.018162
Hsp67Bc	FBgn0001229	-3.1582	0.0048268
tRNA:His-GTG-1-4	FBgn0011878	-3.14715	0.0103161
lncRNA:CR45658	FBgn0267218	-3.14557	0.0245031
lncRNA:CR45595	FBgn0267155	-3.13918	0.0069752
tRNA:His-GTG-2-1Psi	FBgn0011877	-3.13414	0.00827182
asRNA:CR45501	FBgn0267057	-3.12951	0.00638842
RnrS	FBgn0011704	-3.12223	0.00939807
CG14903	FBgn0038446	-3.11894	0.00924664
asRNA:CR31144	FBgn0051144	-3.09685	0.00507288
lncRNA:CR44550	FBgn0265743	-3.09582	0.0236419
danr	FBgn0039283	-3.09428	0.00686163
snoRNA:185	FBgn0065076	-3.08627	0.0111111
Optix	FBgn0025360	-3.0795	0.0140356
CG11700	FBgn0029856	-3.06783	0.00729699
CG33155	FBgn0053155	-3.06564	0.0071077
mRpL53	FBgn0050481	-3.06564	0.0071077
lncRNA:CR43410	FBgn0263329	-3.05364	0.0067102
lncRNA:CR43644	FBgn0263653	-3.05022	0.0224115
snRNA:U1:95Cb	FBgn0004186	-3.04432	0.00674806
asRNA:CR44340	FBgn0265428	-3.03993	0.00418323
asRNA:CR44266	FBgn0265252	-3.03744	0.00626538
snRNA:U5:38ABb	FBgn0043021	-3.03176	0.0132406
lncRNA:CR44941	FBgn0266246	-3.02491	0.0257903
lncRNA:CR13130	FBgn0040965	-3.0249	0.0067102
sna	FBgn0003448	-3.00153	0.0131743
CR45391	FBgn0266940	-2.99406	0.0236703
CG13287	FBgn0035643	-2.98407	0.0164017
CG15482	FBgn0032483	-2.98379	0.00703199
mir-966	FBgn0262317	-2.96997	0.0148022
awd	FBgn0000150	-2.96396	0.00633163
Pdxk	FBgn0085484	-2.96133	0.0127106
CG3939	FBgn0040396	-2.96044	0.00681431
CG34296	FBgn0085325	-2.95826	0.0192977
lncRNA:CR44800	FBgn0266035	-2.95337	0.0247965
lncRNA:CR44551	FBgn0265744	-2.95271	0.022932
lncRNA:CR45717	FBgn0267281	-2.94542	0.0100322
lncRNA:CR45550	FBgn0267110	-2.93603	0.0353398
snoRNA:Me5.8S-G74	FBgn0086066	-2.9339	0.0140734
CG44532	FBgn0265725	-2.92903	0.00903843
CG3770	FBgn0035085	-2.927	0.017651
MED21	FBgn0040020	-2.92062	0.00830967
lncRNA:CR44410	FBgn0265583	-2.90099	0.00611395
snRNA:U3	FBgn0003926	-2.8916	0.0347624
lncRNA:CR44930	FBgn0266235	-2.89111	0.01113
lncRNA:CR43724	FBgn0263970	-2.88939	0.0180201
lncRNA:CR44032	FBgn0264824	-2.88743	0.0264528
hkb	FBgn0261434	-2.88457	0.0139977
wuc	FBgn0033770	-2.88042	0.0158243
CG16762	FBgn0035343	-2.88022	0.0248533
CG31548	FBgn0051548	-2.87939	0.0224872
Dcp-1	FBgn0010501	-2.87847	0.0075336
asRNA:CR45397	FBgn0266946	-2.87219	0.00619913
CG30016	FBgn0050016	-2.86744	0.0112247
lncRNA:CR44413	FBgn0265586	-2.86488	0.0324342
tRNA:iMet-CAT-1-3	FBgn0052482	-2.86392	0.0201969
CG17625	FBgn0039002	-2.86152	0.0182094
lncRNA:CR44762	FBgn0265983	-2.86015	0.00816771
lncRNA:CR45551	FBgn0267111	-2.85957	0.0287905
lncRNA:CR45914	FBgn0267574	-2.85369	0.0155404
snoRNA:Me18S-C1096	FBgn0086055	-2.84966	0.00836646
lncRNA:CR43285	FBgn0262974	-2.84915	0.0112531
lncRNA:CR44763	FBgn0265984	-2.848	0.0126443
lncRNA:CR46113	FBgn0267782	-2.84463	0.00677645
lncRNA:CR45387	FBgn0266936	-2.84344	0.00858414
CG13994	FBgn0031772	-2.8428	0.00916146
Nf-YB	FBgn0032816	-2.84228	0.0138652
Fer1	FBgn0037475	-2.83857	0.0194302
lncRNA:CR44414	FBgn0265587	-2.83146	0.040725
ND-B14.5B	FBgn0031505	-2.83115	0.00969146
asRNA:CR44093	FBgn0264902	-2.8072	0.00754306
lncRNA:CR43431	FBgn0263379	-2.80389	0.0232065
lncRNA:CR45915	FBgn0267575	-2.79024	0.00883021
CG44439	FBgn0265632	-2.77649	0.0288378
CycB3	FBgn0015625	-2.7721	0.0143006
snoRNA:Psi28S-2566	FBgn0086661	-2.7548	0.0281847
mir-2c	FBgn0262397	-2.75453	0.00601931
CG31717	FBgn0051717	-2.75289	0.00850842
lncRNA:CR44539	FBgn0265732	-2.74991	0.0146886
CG1827	FBgn0033431	-2.73986	0.0111584
CG11699	FBgn0030311	-2.73891	0.0100511
snoRNA:U49:66Da	FBgn0060292	-2.73786	0.00791217
snoRNA:Psi28S-291	FBgn0065064	-2.73289	0.00923718
lncRNA:CR33963	FBgn0053963	-2.72975	0.0100416
lncRNA:CR45241	FBgn0266776	-2.72766	0.038198
mRpL55	FBgn0038678	-2.71834	0.00797842
CG4565	FBgn0037841	-2.71619	0.0126159
CG13891	FBgn0035139	-2.70872	0.0199981
esg	FBgn0287768	-2.69524	0.0189286
CG44362	FBgn0265469	-2.69381	0.0151524
mir-13a	FBgn0262429	-2.68212	0.00722128
asRNA:CR45815	FBgn0267465	-2.68134	0.0109313
Trx-2	FBgn0040070	-2.67221	0.0101931
Bacc	FBgn0031453	-2.66794	0.00624645
lncRNA:CR44209	FBgn0265107	-2.66546	0.00730645
E(spl)malpha-BFM	FBgn0002732	-2.65869	0.0388889
tRNA:Phe-GAA-1-4	FBgn0050333	-2.65719	0.0232444
Dph1	FBgn0036194	-2.65698	0.0126538
lncRNA:CR45723	FBgn0267287	-2.65297	0.0308537
EMC8-9	FBgn0034791	-2.65098	0.0157676
CG4650	FBgn0032549	-2.6505	0.0449082
CG13751	FBgn0033340	-2.64563	0.00756199
Rap2l	FBgn0283666	-2.63884	0.0112531
tRNA:Lys-TTT-2-4	FBgn0011904	-2.62706	0.0315635
lncRNA:CR45169	FBgn0266679	-2.61775	0.038056
tll	FBgn0003720	-2.60522	0.023727
snoRNA:Or-CD11a	FBgn0086072	-2.59841	0.00937914
snoRNA:Or-CD11b	FBgn0086071	-2.59841	0.00937914
PIG-H	FBgn0037535	-2.59726	0.0151145
CG45544	FBgn0267104	-2.59692	0.0276358
CG34021	FBgn0054021	-2.58492	0.0118872
CG4957	FBgn0032205	-2.5819	0.0130797
Fer2	FBgn0038402	-2.5747	0.0224399
CG6610	FBgn0035675	-2.56852	0.00933182
lncRNA:CR44306	FBgn0265365	-2.56818	0.00940753
tRNA:Ile-AAT-1-9	FBgn0050215	-2.56261	0.0241529
lncRNA:CR43440	FBgn0263388	-2.56211	0.0453057
CG6567	FBgn0037842	-2.56024	0.0152092
Dic3	FBgn0033248	-2.55896	0.0221654
RNaseMRP:RNA	FBgn0065098	-2.5588	0.0368446
lncRNA:CR45809	FBgn0267459	-2.54703	0.0261215
asRNA:CR44416	FBgn0265589	-2.54374	0.0131649
VepD	FBgn0053200	-2.54152	0.00762824
FRG1	FBgn0036964	-2.54135	0.0168181
lncRNA:CR45212	FBgn0266739	-2.53752	0.0171683
mir-996	FBgn0262404	-2.53635	0.0253549
Bro	FBgn0013755	-2.53331	0.0189002
alphaTub84B	FBgn0003884	-2.52966	0.00781753
lncRNA:CR33218	FBgn0053218	-2.52866	0.0197615
lncRNA:CR44585	FBgn0265796	-2.52757	0.0315635
CG14042	FBgn0260451	-2.51255	0.0103824
SP555	FBgn0260470	-2.51255	0.0103824
lncRNA:CR45334	FBgn0266873	-2.50314	0.047208
lncRNA:CR42755	FBgn0261813	-2.49538	0.0235472
lncRNA:CR43765	FBgn0264265	-2.4937	0.0259322
CG5214	FBgn0037891	-2.48877	0.0177361
Cyp1	FBgn0004432	-2.4856	0.00906682
Dtd	FBgn0037898	-2.47841	0.0142817
arg	FBgn0023535	-2.47749	0.00939807
Neos	FBgn0024542	-2.47097	0.0116695
CG32806	FBgn0052806	-2.47047	0.0127863
CG15027	FBgn0030611	-2.46804	0.0145751
CG13541	FBgn0034841	-2.46205	0.0336173
Mes2	FBgn0037207	-2.46169	0.0357089
7B2	FBgn0041707	-2.46136	0.00910468
Gclm	FBgn0046114	-2.45516	0.017367
lncRNA:CR46211	FBgn0267930	-2.45294	0.0216449
mir-985	FBgn0262283	-2.45294	0.0216449
snoRNA:Or-CD1	FBgn0086027	-2.44056	0.0279481
lncRNA:CR44753	FBgn0265966	-2.43694	0.0300871
CG15432	FBgn0031603	-2.43598	0.0137043
CG5532	FBgn0034902	-2.43337	0.0326708
CG2217	FBgn0027544	-2.42929	0.020812
CG42740	FBgn0261704	-2.42929	0.020812
HINT1	FBgn0031459	-2.42695	0.0138463
snoRNA:Me28S-G3081a	FBgn0063381	-2.42438	0.0114897
tsh	FBgn0003866	-2.42404	0.018039
tRNA:Glu-TTC-1-4	FBgn0011850	-2.41752	0.0194208
CG45428	FBgn0266977	-2.40544	0.0104013
tRNA:Ile-AAT-1-8	FBgn0050509	-2.4053	0.0274465
CG34263	FBgn0085292	-2.39655	0.0197615
Sfp79B	FBgn0259973	-2.39353	0.0215597
CG13928	FBgn0035246	-2.39235	0.0132974
lncRNA:CR46156	FBgn0267868	-2.39096	0.0128715
CR43080	FBgn0262510	-2.38238	0.0179727
mir-981	FBgn0262178	-2.38223	0.0144047
lncRNA:CR44851	FBgn0266145	-2.38084	0.0108272
asRNA:CR43723	FBgn0263967	-2.37708	0.0347908
Mettl2	FBgn0035247	-2.37025	0.0135813
Ilp6	FBgn0044047	-2.3642	0.0455234
lncRNA:CR46001	FBgn0267663	-2.3638	0.0223074
CG4186	FBgn0040634	-2.36311	0.0127958
eIF6	FBgn0034915	-2.36232	0.0206038
CecC	FBgn0000279	-2.36138	0.0481355
lncRNA:CR43804	FBgn0264348	-2.35842	0.036466
CG3437	FBgn0035998	-2.34749	0.0127295
Amun	FBgn0030328	-2.3473	0.0133163
lncRNA:CR45416	FBgn0266965	-2.34605	0.0261499
koko	FBgn0264816	-2.34404	0.0210581
CG9016	FBgn0031751	-2.34103	0.0239353
Hsc70-4	FBgn0266599	-2.33987	0.0148401
Cpr65Az	FBgn0035686	-2.33968	0.0292164
CG3552	FBgn0035999	-2.33801	0.0175658
snRNA:LU	FBgn0263847	-2.3312	0.0224778
snRNA:U5:38ABa	FBgn0043022	-2.329	0.0153984
msd5	FBgn0035210	-2.32849	0.0226197
CG6770	FBgn0032400	-2.32739	0.00940753
lncRNA:CR32218	FBgn0052218	-2.32294	0.0225156
CG4452	FBgn0035981	-2.31415	0.0210865
CG5380	FBgn0038951	-2.31284	0.0229037
l(1)G0320	FBgn0028327	-2.30957	0.0142249
Cnx99A	FBgn0015622	-2.30775	0.0224588
CG6845	FBgn0035099	-2.30397	0.0275696
asRNA:CR46093	FBgn0267762	-2.29665	0.0123793
RpL14	FBgn0017579	-2.29442	0.0156256
Rcd4	FBgn0032034	-2.28835	0.0152376
elav	FBgn0260400	-2.28212	0.0116127
Oli	FBgn0032651	-2.27778	0.0123131
CG3817	FBgn0038275	-2.27774	0.0282794
lncRNA:CR43621	FBgn0263612	-2.27366	0.0421446
CG11839	FBgn0039271	-2.2718	0.0287999
smt3	FBgn0264922	-2.26755	0.0109502
Dlip3	FBgn0040465	-2.26666	0.0182094
lncRNA:CR31044	FBgn0051044	-2.26658	0.0280239
CG4511	FBgn0037843	-2.26043	0.0220519
CG3719	FBgn0024986	-2.25768	0.0141681
CG32639	FBgn0052639	-2.2556	0.0386617
snoRNA:lola-d	FBgn0263483	-2.24914	0.0234337
asRNA:CR45873	FBgn0267533	-2.2444	0.0141208
CG12868	FBgn0033945	-2.24412	0.0187299
CG13482	FBgn0036419	-2.24284	0.0425232
lncRNA:CR44697	FBgn0265908	-2.23653	0.0459682
CG14907	FBgn0038455	-2.2301	0.0489021
CG10731	FBgn0034081	-2.22838	0.0129945
mira	FBgn0021776	-2.22749	0.0270017
snoRNA:Or-CD11	FBgn0086082	-2.2269	0.0167424
hng3	FBgn0035160	-2.22629	0.018711
CG4570	FBgn0037844	-2.22474	0.0351221
Rfx	FBgn0020379	-2.21754	0.0306833
Takl1	FBgn0046689	-2.21614	0.0498202
CG44355	FBgn0265455	-2.21012	0.0424096
tRNA:Leu-AAG-1-1	FBgn0050241	-2.20962	0.0262919
tRNA:Arg-TCG-2-4	FBgn0053551	-2.20874	0.0310524
mRpS14	FBgn0044030	-2.20577	0.0136381
ms(3)K81	FBgn0002838	-2.20454	0.0156256
CG4042	FBgn0037018	-2.20436	0.0224683
snoRNA:Me18S-G1358a	FBgn0086053	-2.20164	0.0141586
cerv	FBgn0030657	-2.20023	0.0264717
ph-p	FBgn0004861	-2.1988	0.0190327
mir-995	FBgn0262185	-2.19324	0.0227522
CG32450	FBgn0052450	-2.19199	0.0178213
lncRNA:CR45025	FBgn0266383	-2.18881	0.0321882
Sf3a2	FBgn0036314	-2.18272	0.0272856
CG17272	FBgn0038830	-2.18259	0.0132406
CG3408	FBgn0036008	-2.17871	0.0151429
lncRNA:CR44731	FBgn0265944	-2.17376	0.0214461
snoRNA:Psi28S-2562	FBgn0082986	-2.1699	0.0181336
asRNA:CR46044	FBgn0267711	-2.16856	0.0168465
mir-8	FBgn0262432	-2.16536	0.0323017
eEF1alpha1	FBgn0284245	-2.16332	0.0151902
CG17996	FBgn0032595	-2.15849	0.0162029
lncRNA:CR44541	FBgn0265734	-2.15583	0.0232065
CG13392	FBgn0032033	-2.15491	0.0142154
p38c	FBgn0267339	-2.15124	0.0406114
CG30159	FBgn0050159	-2.14789	0.042845
mus302	FBgn0287696	-2.14494	0.0209729
lncRNA:CR45290	FBgn0266828	-2.1445	0.0285822
RpL3	FBgn0020910	-2.14359	0.0216733
lncRNA:CR44655	FBgn0265866	-2.14318	0.027986
lncRNA:CR45643	FBgn0267203	-2.13962	0.0123699
lncRNA:CR46009	FBgn0267673	-2.13886	0.0164301
MED8	FBgn0034503	-2.13788	0.030901
asRNA:CR45525	FBgn0267081	-2.13404	0.0309578
asRNA:CR44124	FBgn0264955	-2.13249	0.0128052
l(3)neo38	FBgn0265276	-2.13148	0.0162786
HemK2	FBgn0031454	-2.12859	0.0171967
Snapin	FBgn0031455	-2.12859	0.0171967
CG5500	FBgn0039461	-2.12642	0.0344691
Vha16-5	FBgn0032294	-2.12502	0.0289987
CG32039	FBgn0052039	-2.12502	0.0184365
CG33137	FBgn0053137	-2.12255	0.023481
ave	FBgn0050476	-2.12175	0.0179917
Vamp7	FBgn0266186	-2.11995	0.0312512
pita	FBgn0034878	-2.11694	0.0189476
lncRNA:CR45297	FBgn0266835	-2.11345	0.0323112
CG10222	FBgn0036356	-2.10965	0.0275506
snoRNA:Me18S-A1061	FBgn0082952	-2.109	0.0167329
snoRNA:Me18S-G1952	FBgn0082950	-2.109	0.0167329
CG30384	FBgn0050384	-2.10635	0.0429585
asRNA:CR44653	FBgn0265864	-2.10456	0.0420405
CG34008	FBgn0054008	-2.09864	0.0230172
CG34200	FBgn0085229	-2.09804	0.0199224
lncRNA:CR43762	FBgn0264262	-2.09724	0.0498486
snoRNA:U49:66Db	FBgn0060291	-2.09689	0.020566
CG8319	FBgn0037722	-2.09397	0.0188719
lncRNA:CR43857	FBgn0264439	-2.09265	0.0139977
Corp	FBgn0030028	-2.09254	0.0278724
dgt2	FBgn0032390	-2.09187	0.0172156
scaRNA:MeU5-C46	FBgn0043853	-2.09014	0.0306928
Nxt1	FBgn0028411	-2.0848	0.0310051
Vti1b	FBgn0264751	-2.08341	0.0430248
mRpS10	FBgn0038307	-2.08276	0.0228658
CG17734	FBgn0037890	-2.07998	0.0235283
lncRNA:CR45267	FBgn0266805	-2.07987	0.0426935
lncRNA:CR46218	FBgn0267938	-2.07918	0.0269165
RpL15	FBgn0028697	-2.07341	0.0143384
ytr	FBgn0021895	-2.07009	0.0273519
insv	FBgn0031434	-2.06498	0.0361632
CG14321	FBgn0038540	-2.05726	0.0199697
lncRNA:CR32582	FBgn0052582	-2.05547	0.0444918
lncRNA:CR46086	FBgn0267755	-2.05508	0.0399867
Nrt	FBgn0004108	-2.05481	0.017367
lncRNA:CR31386	FBgn0051386	-2.05381	0.0211054
Ets65A	FBgn0005658	-2.05256	0.0356237
CG31955	FBgn0051955	-2.04709	0.0366364
lncRNA:CR43097	FBgn0262543	-2.04692	0.0325573
snoRNA:Psi28S-2648	FBgn0065055	-2.04365	0.0233958
RpS2	FBgn0004867	-2.04054	0.0304467
CG33140	FBgn0053140	-2.03977	0.0447
mei-S332	FBgn0002715	-2.03709	0.0288946
lncRNA:CR45038	FBgn0266398	-2.02691	0.0421635
Atg12	FBgn0036255	-2.0247	0.0244937
toy	FBgn0019650	-2.02425	0.0230456
asRNA:CR45016	FBgn0266372	-2.02213	0.0199792
CG13898	FBgn0035161	-2.02071	0.0299451
CG10934	FBgn0034263	-2.01682	0.0379803
stg	FBgn0003525	-2.01591	0.0278156
lncRNA:CR45626	FBgn0267186	-2.00614	0.0305792
CG4424	FBgn0038765	-2.00335	0.0399678
CG5013	FBgn0038396	-2.00138	0.0284403
GstE12	FBgn0027590	-2.00094	0.0271247
Mgstl	FBgn0025814	-1.99878	0.0244369
ro	FBgn0003267	-1.99333	0.0428071
lncRNA:CR46200	FBgn0267919	-1.99107	0.0338444
lncRNA:CR42721	FBgn0261638	-1.98717	0.0210013
CG12496	FBgn0040385	-1.9838	0.041766
tRNA:Gln-TTG-1-3	FBgn0051070	-1.97978	0.0426841
CG15233	FBgn0033076	-1.97443	0.0328507
mir-190	FBgn0262387	-1.96563	0.0349991
lncRNA:CR45221	FBgn0266748	-1.95768	0.0364282
Chrac-14	FBgn0043002	-1.95428	0.0257997
yps	FBgn0022959	-1.95313	0.028904
Mos	FBgn0033773	-1.95056	0.0379992
asRNA:CR45264	FBgn0266802	-1.94812	0.0179727
jigr1	FBgn0039350	-1.94346	0.0368825
CR30409	FBgn0050409	-1.94287	0.0401666
CR43972	FBgn0264703	-1.93892	0.026131
CG34300	FBgn0085329	-1.93818	0.0280333
CG14777	FBgn0026872	-1.93623	0.0190801
lncRNA:CR45409	FBgn0266958	-1.93045	0.0306265
CG34149	FBgn0083985	-1.9271	0.03622
lncRNA:CR46229	FBgn0267949	-1.92235	0.0408007
lncRNA:CR43973	FBgn0264704	-1.92058	0.0186826
CG15478	FBgn0029955	-1.91701	0.0218626
asRNA:CR45528	FBgn0267084	-1.91649	0.0192788
lncRNA:CR44723	FBgn0265934	-1.9135	0.0469336
lncRNA:CR44540	FBgn0265733	-1.91259	0.036996
lncRNA:CR44928	FBgn0266233	-1.9108	0.0481829
lncRNA:CR45217	FBgn0266744	-1.9075	0.0165058
lncRNA:CR44857	FBgn0266151	-1.90188	0.0433371
CG32706	FBgn0052706	-1.8926	0.0419364
snoRNA:kis-a	FBgn0263465	-1.89229	0.0409426
lncRNA:CR44041	FBgn0264833	-1.89152	0.0393053
tRNA:Gln-TTG-2-1	FBgn0052493	-1.88735	0.0309389
snoRNA:Me28S-U2134a	FBgn0086051	-1.8845	0.0350274
tRNA:His-GTG-1-2	FBgn0050250	-1.87963	0.0279576
lncRNA:CR43297	FBgn0262989	-1.87611	0.0298978
Rcd-1	FBgn0031047	-1.87542	0.0232349
Taf12	FBgn0011290	-1.87206	0.0201117
snoRNA:Me18S-C419	FBgn0086533	-1.86877	0.0177172
CNBP	FBgn0034802	-1.8597	0.0230929
VhaM9.7-b	FBgn0028663	-1.85487	0.0236987
ebd2	FBgn0037076	-1.85357	0.0439807
CG42554	FBgn0260756	-1.85281	0.0416998
brk	FBgn0024250	-1.84951	0.0271437
SPARC	FBgn0026562	-1.84477	0.0440848
Scox	FBgn0262467	-1.84408	0.0226481
RpS24	FBgn0261596	-1.84353	0.0215692
CG18641	FBgn0031426	-1.84283	0.0439712
ND-B14.5AL	FBgn0037172	-1.83932	0.0345164
CG18809	FBgn0042132	-1.83304	0.0267935
RpL9	FBgn0015756	-1.83274	0.0434412
LSm3	FBgn0051184	-1.83117	0.0245221
snoRNA:Psi28S-3405d	FBgn0082957	-1.82784	0.0268976
CG8360	FBgn0032001	-1.82736	0.0287053
COX6B	FBgn0031066	-1.82298	0.0266705
dati	FBgn0262636	-1.82195	0.0204808
mirr	FBgn0014343	-1.81976	0.0472648
Sec61beta	FBgn0010638	-1.81413	0.0248438
Axn	FBgn0026597	-1.81208	0.0375923
CG43345	FBgn0263050	-1.80903	0.0260553
CG43346	FBgn0263051	-1.80903	0.0260553
CG2852	FBgn0034753	-1.80849	0.0274276
CG2100	FBgn0037369	-1.80364	0.0367405
oc	FBgn0004102	-1.80207	0.0490157
CG32119	FBgn0052119	-1.80051	0.0415673
CG34117	FBgn0083953	-1.79437	0.0322828
lncRNA:CR45360	FBgn0266900	-1.79359	0.0427125
lncRNA:CR45826	FBgn0267476	-1.79075	0.0497161
snoRNA:Me28S-A771	FBgn0086067	-1.78967	0.0444539
CG44296	FBgn0265342	-1.7864	0.0247303
eEF1beta	FBgn0028737	-1.78596	0.0310335
Rab14	FBgn0015791	-1.78497	0.0276453
lncRNA:CR45618	FBgn0267178	-1.78413	0.0293772
CG5854	FBgn0039130	-1.78159	0.0289419
CG12862	FBgn0033950	-1.77872	0.0462427
Ndf	FBgn0043456	-1.77804	0.039381
Taf11	FBgn0011291	-1.77635	0.0230078
snoRNA:Me28S-U2134b	FBgn0260002	-1.77607	0.0372042
lncRNA:CR45398	FBgn0266947	-1.77519	0.0250994
lola	FBgn0283521	-1.77276	0.0220424
VGlut	FBgn0031424	-1.77124	0.033674
lncRNA:CR45919	FBgn0267579	-1.77103	0.0197236
anox	FBgn0064116	-1.77032	0.0380466
SLIRP1	FBgn0064117	-1.77032	0.0380466
CG5934	FBgn0039505	-1.76963	0.0204619
Nup44A	FBgn0033247	-1.76831	0.024011
CG8490	FBgn0033715	-1.7664	0.0290839
Naa40	FBgn0039687	-1.76093	0.0349139
spidey	FBgn0029975	-1.7604	0.029576
CG1789	FBgn0030063	-1.75483	0.0302858
CG5986	FBgn0043455	-1.75294	0.0283267
CG5885	FBgn0025700	-1.75261	0.0282794
her	FBgn0001185	-1.75089	0.0462143
Kr-h1	FBgn0266450	-1.74988	0.0389646
pim	FBgn0003087	-1.74542	0.0434128
ATPsynD	FBgn0016120	-1.745	0.0320746
Tapdelta	FBgn0021795	-1.7449	0.0304183
CG9855	FBgn0037242	-1.73933	0.0377248
CkIIalpha-i3	FBgn0025676	-1.73768	0.0477191
Gad1	FBgn0004516	-1.73204	0.0392485
CG2211	FBgn0035211	-1.73064	0.0260931
RpL13A	FBgn0037351	-1.7305	0.0412076
Sidpn	FBgn0032741	-1.72956	0.0299735
asRNA:CR31429	FBgn0063298	-1.72899	0.0474162
snoRNA:Me18S-G1358b	FBgn0086054	-1.72009	0.0287905
cer	FBgn0034443	-1.71761	0.030371
CG31855	FBgn0051855	-1.7175	0.0254496
zuc	FBgn0261266	-1.71735	0.0486655
Uba1	FBgn0023143	-1.71613	0.032349
asRNA:CR45928	FBgn0267590	-1.7159	0.0390309
lncRNA:CR45112	FBgn0266587	-1.71563	0.0225251
lncRNA:CR45111	FBgn0266586	-1.71373	0.0226576
Ccdc58	FBgn0036909	-1.71362	0.0271531
mir-4960	FBgn0263534	-1.71262	0.0325194
CG31229	FBgn0051229	-1.70915	0.0325005
CG13807	FBgn0035323	-1.70852	0.0356899
CG42393	FBgn0259739	-1.70848	0.0337876
Phs	FBgn0036522	-1.70316	0.0346394
CG9948	FBgn0035721	-1.69917	0.0358414
asRNA:CR43820	FBgn0264368	-1.69892	0.0246924
CR45315	FBgn0266854	-1.69703	0.0249101
lncRNA:CR45917	FBgn0267577	-1.69669	0.0445675
crol	FBgn0020309	-1.69546	0.0309767
CG42392	FBgn0259738	-1.69542	0.0244747
CG10466	FBgn0032822	-1.69343	0.0377721
phyl	FBgn0013725	-1.69001	0.0288189
lncRNA:CR44766	FBgn0265987	-1.68354	0.0233012
mthl14	FBgn0052476	-1.68253	0.0481734
betaTub56D	FBgn0284243	-1.68225	0.0232633
Gapdh1	FBgn0001091	-1.68137	0.0340905
RpL23	FBgn0010078	-1.68122	0.0259606
Lsm12a	FBgn0030364	-1.67781	0.0364471
CG3386	FBgn0035152	-1.67631	0.0381885
pros	FBgn0004595	-1.67388	0.0251467
asRNA:CR44045	FBgn0264837	-1.67347	0.0481829
YME1L	FBgn0034792	-1.67237	0.0446243
RpL39	FBgn0023170	-1.67175	0.0310714
Crz	FBgn0013767	-1.67037	0.0382075
Ip259	FBgn0025366	-1.66849	0.0413875
kud	FBgn0036667	-1.66627	0.0309767
RpS27A	FBgn0003942	-1.66286	0.0431384
lncRNA:CR45922	FBgn0267582	-1.65943	0.0424853
asRNA:CR45028	FBgn0266388	-1.65433	0.0368351
eIF3f1	FBgn0037270	-1.64753	0.0335605
snRNA:U2:38ABa	FBgn0003922	-1.63809	0.0490725
MrgBP	FBgn0033341	-1.63075	0.0270585
Diap1	FBgn0260635	-1.62476	0.0266894
snoRNA:U3:54Aa	FBgn0065048	-1.62401	0.0467727
CG42376	FBgn0259722	-1.62312	0.0270869
lncRNA:CR44957	FBgn0266262	-1.61772	0.0377153
ebd1	FBgn0035153	-1.61469	0.0381128
snoRNA:Or-CD11c	FBgn0086070	-1.61305	0.0364376
CG14989	FBgn0035495	-1.61128	0.0315635
CG12895	FBgn0033523	-1.61105	0.0429396
asRNA:CR45146	FBgn0266639	-1.611	0.0329074
chm	FBgn0028387	-1.59984	0.0314215
CG34116	FBgn0083952	-1.59119	0.0319894
mir-10	FBgn0262424	-1.5857	0.0371948
ATPsynG	FBgn0010612	-1.5836	0.0307401
CG12107	FBgn0033209	-1.58357	0.0345258
asRNA:CR45827	FBgn0267477	-1.57879	0.0382642
snmRNA:CR43701	FBgn0263839	-1.57755	0.0380655
snoRNA:Psi28S-2622	FBgn0086670	-1.57755	0.0380655
lncRNA:CR30055	FBgn0050055	-1.5735	0.0272762
cni	FBgn0000339	-1.56892	0.040176
CG17721	FBgn0037885	-1.56721	0.0288946
CG15317	FBgn0030137	-1.56165	0.0349991
lncRNA:CR44828	FBgn0266086	-1.56153	0.0308631
lncRNA:CR45659	FBgn0267219	-1.5584	0.027721
CG12909	FBgn0033507	-1.55467	0.0489305
lncRNA:CR46035	FBgn0267702	-1.55207	0.0322544
asRNA:CR45162	FBgn0266655	-1.54982	0.0416525
Hsp27	FBgn0001226	-1.54775	0.0301439
asRNA:CR45132	FBgn0266625	-1.54315	0.0373178
RpS15Aa	FBgn0010198	-1.54273	0.0399489
RpL18	FBgn0035753	-1.53751	0.0458925
GstO1	FBgn0035907	-1.5334	0.047738
snRNA:U4:38AB	FBgn0003931	-1.53109	0.0346867
CG3223	FBgn0037538	-1.52897	0.0455896
CR14798	FBgn0029588	-1.52733	0.0392296
CG14104	FBgn0040786	-1.52515	0.0348949
lncRNA:cherub	FBgn0262972	-1.52493	0.0315067
lncRNA:CR44344	FBgn0265444	-1.52449	0.0387375
CG3909	FBgn0027524	-1.52366	0.0402707
CG2063	FBgn0033400	-1.51788	0.0450407
CG4230	FBgn0031683	-1.5164	0.0444161
Mst85C	FBgn0028708	-1.5149	0.0383116
AlkB	FBgn0065035	-1.51284	0.0455802
lncRNA:CR45910	FBgn0267570	-1.50814	0.028904
Ufm1	FBgn0085220	-1.50658	0.0367689
Fis1	FBgn0039969	-1.5036	0.0389835
mRpL17	FBgn0035122	-1.50229	0.0470566
CG6870	FBgn0032652	-1.5012	0.0495457
ICA69	FBgn0037050	-1.50085	0.0410373
lncRNA:CR44268	FBgn0265254	-1.49242	0.0314783
Ibf1	FBgn0037670	-1.49046	0.0456275
VGAT	FBgn0033911	-1.48766	0.0485141
Top3beta	FBgn0026015	-1.4871	0.0498864
Lac	FBgn0010238	-1.48351	0.0462521
Sox14	FBgn0005612	-1.47548	0.0492996
chic	FBgn0000308	-1.47487	0.0335699
COX7AL	FBgn0037579	-1.4745	0.0356805
lncRNA:CR43821	FBgn0264369	-1.46531	0.0324815
Map60	FBgn0010342	-1.46328	0.0485236
lncRNA:CR42862	FBgn0262109	-1.45279	0.0335794
asRNA:CR45927	FBgn0267589	-1.45217	0.0396271
CG15601	FBgn0030673	-1.43575	0.0381034
Rab27	FBgn0025382	-1.43507	0.0487318
lncRNA:CR43496	FBgn0263507	-1.43088	0.0490252
RpS28b	FBgn0030136	-1.42105	0.0351694
snmRNA:649	FBgn0065087	-1.41598	0.0410657
lncRNA:CR43900	FBgn0264501	-1.41012	0.034346
Tsen2	FBgn0051812	-1.40686	0.0408859
hng1	FBgn0034599	-1.40368	0.0487507
CG13920	FBgn0025712	-1.3953	0.0439996
CG2127	FBgn0033286	-1.39439	0.0495741
asRNA:CR43433	FBgn0263381	-1.38854	0.0490914
VAChT	FBgn0270928	-1.37493	0.0450407
COX8	FBgn0263911	-1.36887	0.0410846
lncRNA:CR45527	FBgn0267083	-1.36527	0.0394473
CG7637	FBgn0033548	-1.36226	0.048022
asRNA:CR45907	FBgn0267567	-1.35969	0.0375828
Kmn2	FBgn0266598	-1.35705	0.0460155
CG9837	FBgn0037635	-1.35339	0.0463752
lncRNA:CR44331	FBgn0265419	-1.35183	0.047085
Nepl11	FBgn0037230	-1.35132	0.0387753
CG1896	FBgn0039870	-1.35123	0.0409237
CG4293	FBgn0024983	-1.34734	0.0487223
asRNA:CR45257	FBgn0266795	-1.34365	0.0383873
Tina-1	FBgn0035083	-1.33886	0.0478327
CG13204	FBgn0033627	-1.33151	0.0490441
CG7370	FBgn0037133	-1.3311	0.0440943
snoRNA:Psi18S-531	FBgn0083027	-1.32687	0.0487507
mRpS7	FBgn0032236	-1.32355	0.0456937
CG32147	FBgn0047178	-1.31212	0.0420784
REPTOR-BP	FBgn0032202	-1.30664	0.0480598
CG17486	FBgn0032997	-1.30362	0.0461953
sni	FBgn0030026	-1.30197	0.0452678
noc	FBgn0005771	-1.29894	0.0487034
CG12643	FBgn0040942	-1.28314	0.0457978
lncRNA:CR45438	FBgn0266987	-1.26499	0.0463562
RpL36	FBgn0002579	-1.25585	0.047757
tsr	FBgn0011726	-1.25514	0.0484195
snoRNA:Me18S-A1576	FBgn0025881	-1.23845	0.0467916
lncRNA:CR45246	FBgn0266781	1.23204	0.0471891
Arf79F	FBgn0010348	1.27792	0.0472364
lncRNA:CR43301	FBgn0262993	1.34166	0.0418418
CG11076	FBgn0039929	1.34461	0.0438955
snoRNA:Me18S-C1280	FBgn0086059	1.36474	0.0491387
lncRNA:CR45358	FBgn0266898	1.36822	0.0457884
mir-287	FBgn0262400	1.36822	0.0457884
asRNA:CR44321	FBgn0265380	1.37162	0.0430532
asRNA:CR45968	FBgn0267630	1.38903	0.0461953
CG14853	FBgn0038246	1.39412	0.0487223
CG9154	FBgn0031777	1.39515	0.0471039
mRpL27	FBgn0053002	1.39702	0.0447662
CG15237	FBgn0033104	1.39708	0.0404884
CG15390	FBgn0031419	1.39912	0.0358224
lncRNA:CR45805	FBgn0267455	1.40125	0.0454287
Mob3	FBgn0259482	1.40532	0.044558
unc-119	FBgn0025549	1.41475	0.0498391
mir-4951	FBgn0263537	1.41619	0.036731
snoRNA:Psi28S-3305a	FBgn0082976	1.42597	0.0415957
snoRNA:Psi28S-3405a	FBgn0082960	1.42597	0.0415957
snoRNA:Psi28S-3405b	FBgn0082959	1.42597	0.0415957
snoRNA:Psi28S-3405c	FBgn0082958	1.42597	0.0415957
CG8152	FBgn0034008	1.42656	0.0489021
asRNA:CR44982	FBgn0266317	1.4316	0.0341189
CG7646	FBgn0036926	1.43191	0.0482207
CG5037	FBgn0032222	1.4338	0.0453246
CG9662	FBgn0031529	1.43433	0.0436873
RabX4	FBgn0051118	1.44329	0.0442362
lncRNA:CR45199	FBgn0266726	1.45479	0.041766
CG12818	FBgn0037809	1.47284	0.046413
comm	FBgn0010105	1.47572	0.04152
CG3165	FBgn0031484	1.47594	0.0473973
lncRNA:CR44679	FBgn0265890	1.47833	0.0318001
l(2)37Cg	FBgn0086447	1.48087	0.0411603
asRNA:CR46058	FBgn0267725	1.48646	0.0452773
G9a	FBgn0040372	1.49351	0.0473689
CG11151	FBgn0030519	1.49605	0.0499337
mir-281-2	FBgn0286007	1.50224	0.0446053
lncRNA:CR45478	FBgn0267034	1.50266	0.0346867
asRNA:CR45648	FBgn0267208	1.50452	0.0448325
CG11927	FBgn0031638	1.50868	0.04735
snoRNA:nop5-x16-a	FBgn0263467	1.51004	0.0432709
His3.3A	FBgn0014857	1.5102	0.0459871
Not11	FBgn0034963	1.51296	0.0377058
Rrp47	FBgn0030711	1.51558	0.0423528
lncRNA:CR44520	FBgn0265713	1.52067	0.0491198
CG7492	FBgn0035807	1.52691	0.0431194
Chi	FBgn0013764	1.53435	0.0472932
CG13054	FBgn0036584	1.54827	0.0383967
lncRNA:CR45030	FBgn0266390	1.54882	0.0422771
CG9399	FBgn0037715	1.5492	0.0449271
jdp	FBgn0027654	1.55245	0.0391728
slim	FBgn0261477	1.55807	0.0411603
CG32267	FBgn0052267	1.55821	0.0416998
CG5676	FBgn0032200	1.55873	0.0448987
lncRNA:CR44789	FBgn0266024	1.55992	0.0488264
CG44437	FBgn0265629	1.56665	0.0488359
DCTN6-p27	FBgn0086446	1.57004	0.0487602
ReepB	FBgn0033906	1.57158	0.0441416
CG15011	FBgn0035518	1.57455	0.0447189
Syx1A	FBgn0013343	1.57859	0.0440469
CG30039	FBgn0050039	1.57914	0.0475203
lncRNA:CR45309	FBgn0266847	1.58164	0.0457884
Phb2	FBgn0010551	1.58477	0.0483343
CG3860	FBgn0034951	1.58878	0.0481639
lncRNA:CR44978	FBgn0266313	1.59275	0.0433844
CG32225	FBgn0052225	1.59513	0.0449082
Rbp9	FBgn0010263	1.59781	0.0485046
CG14797	FBgn0029587	1.60619	0.0461386
CG11109	FBgn0037200	1.60781	0.0330873
CG14072	FBgn0032318	1.61176	0.0496214
mRpL23	FBgn0035335	1.61558	0.0393526
lncRNA:CR44925	FBgn0266230	1.61729	0.0416335
CG2608	FBgn0032870	1.62259	0.0395135
CG42806	FBgn0261975	1.62473	0.0364755
CG6843	FBgn0036827	1.62535	0.0486277
lncRNA:CR44566	FBgn0265759	1.62585	0.0374219
vsg	FBgn0045823	1.62636	0.035813
mir-11	FBgn0262434	1.6266	0.0373746
mir-998	FBgn0262405	1.6266	0.0373746
CG8149	FBgn0037700	1.63354	0.0281658
sced	FBgn0013732	1.63406	0.0486561
Ripalpha	FBgn0032189	1.63435	0.0493943
CG4461	FBgn0035982	1.63773	0.0292826
CG6800	FBgn0038902	1.63841	0.0444728
Rpn8	FBgn0002787	1.63923	0.0325857
Taf13	FBgn0032847	1.64223	0.0436021
mir-280	FBgn0262440	1.65688	0.0455139
tRNA:Leu-TAG-1-2	FBgn0051023	1.66221	0.032084
tRNA:Leu-TAG-1-1	FBgn0051383	1.66221	0.032084
lncRNA:CR45127	FBgn0266620	1.66915	0.0442268
mir-1009	FBgn0262435	1.6718	0.0482302
asRNA:CR46055	FBgn0267722	1.67241	0.0263108
lncRNA:CR44485	FBgn0265678	1.67821	0.0449461
CG13760	FBgn0040375	1.67941	0.0382642
CG33798	FBgn0053798	1.68334	0.0498959
CG14036	FBgn0031677	1.6843	0.0398448
CG14414	FBgn0030571	1.68961	0.0366364
lncRNA:CR43930	FBgn0264551	1.69446	0.0428639
CG10898	FBgn0037911	1.69558	0.0354155
Trmt112	FBgn0037061	1.70577	0.0348855
lncRNA:CR44973	FBgn0266308	1.7061	0.0473405
ATPsynbeta	FBgn0010217	1.70906	0.0291217
CG11658	FBgn0036196	1.71026	0.0472175
Taf10b	FBgn0026324	1.71481	0.041785
lncRNA:CR43918	FBgn0264539	1.71783	0.0233863
Tim8	FBgn0027359	1.71872	0.0233674
lncRNA:CR45431	FBgn0266980	1.72048	0.0477664
lncRNA:CR45964	FBgn0267626	1.72431	0.0323017
EndoA	FBgn0038659	1.72558	0.0403843
asRNA:CR45121	FBgn0266596	1.729	0.0215976
mir-276b	FBgn0262381	1.72913	0.0447852
CG31677	FBgn0051677	1.72934	0.0453909
Orc6	FBgn0023180	1.72983	0.048287
lncRNA:CR44719	FBgn0265930	1.73089	0.0402139
lncRNA:CR43608	FBgn0263583	1.73704	0.0499527
RpS17	FBgn0005533	1.73704	0.0261783
PIG-F	FBgn0036893	1.73834	0.0332955
lncRNA:CR45032	FBgn0266392	1.73891	0.0413401
CG14641	FBgn0037220	1.74062	0.0360212
CG14135	FBgn0036193	1.74156	0.0371758
CG34228	FBgn0085257	1.74186	0.0217111
Bet1	FBgn0260857	1.74287	0.029434
CG7168	FBgn0038586	1.74535	0.0357373
CG7407	FBgn0037134	1.7497	0.0380371
EMC6	FBgn0039259	1.75041	0.0424285
CG13117	FBgn0032140	1.75093	0.0372326
dmpd	FBgn0033486	1.75805	0.0474636
lncRNA:CR43828	FBgn0264376	1.75886	0.0388132
CG8673	FBgn0031986	1.76	0.0461764
snoRNA:Me28S-G2173	FBgn0086028	1.76231	0.023746
ND-B15	FBgn0033961	1.76901	0.0305603
holn1	FBgn0032250	1.77303	0.0386334
Vps37B	FBgn0037299	1.77304	0.0305224
Scp2	FBgn0020907	1.77412	0.0438387
CG1890	FBgn0039869	1.77417	0.0207174
CG11279	FBgn0036342	1.7757	0.0335321
RpL27A	FBgn0285948	1.77615	0.0277115
lncRNA:CR45187	FBgn0266697	1.77824	0.0373557
CG14054	FBgn0029596	1.78046	0.0316203
CG12004	FBgn0035236	1.78361	0.0479652
lncRNA:CR45359	FBgn0266899	1.78378	0.0473878
snoRNA:SC35-a	FBgn0263468	1.79789	0.0288662
snoRNA:SC35-b	FBgn0263469	1.79789	0.0288662
Lamp1	FBgn0032949	1.79924	0.0377342
Alg13	FBgn0039639	1.80231	0.0353776
CG32313	FBgn0052313	1.8087	0.036201
lncRNA:CR46194	FBgn0267913	1.80983	0.0312985
CG14407	FBgn0030584	1.81112	0.0336835
CG9445	FBgn0040674	1.81121	0.0430532
lncRNA:CR46118	FBgn0267787	1.81228	0.0379708
tRNA:Gly-GCC-1-13	FBgn0011872	1.8123	0.0398732
GC1	FBgn0260743	1.81678	0.0354912
CG33463	FBgn0053463	1.82105	0.0320083
lncRNA:CR45697	FBgn0267261	1.82363	0.0446432
lncRNA:CR44556	FBgn0265749	1.82417	0.0319989
bys	FBgn0010292	1.8248	0.0407344
lncRNA:CR43280	FBgn0262969	1.82597	0.0425137
oaf	FBgn0011818	1.82962	0.030494
mir-100	FBgn0262463	1.83306	0.0306644
CG9308	FBgn0034681	1.83604	0.0487886
CG32581	FBgn0052581	1.8364	0.0446811
lncRNA:CR44660	FBgn0265871	1.8372	0.0337687
CG34454	FBgn0085483	1.83801	0.0253549
CG11999	FBgn0037312	1.84729	0.0270585
Dgkepsilon	FBgn0020930	1.85093	0.0447284
lncRNA:CR46117	FBgn0267786	1.85173	0.0499243
lncRNA:CR45400	FBgn0266949	1.85174	0.0264149
lncRNA:CR45337	FBgn0266876	1.85293	0.0482775
Psf3	FBgn0030196	1.85918	0.0346299
Task7	FBgn0037690	1.86157	0.0401003
lncRNA:CR33942	FBgn0062961	1.86231	0.0412171
CG33169	FBgn0053169	1.86624	0.0315162
exd	FBgn0000611	1.86932	0.0300208
lncRNA:CR46238	FBgn0267958	1.87752	0.0467348
lncRNA:CR45982	FBgn0267644	1.87811	0.0361253
asRNA:CR43786	FBgn0264327	1.87963	0.0350085
Taf6	FBgn0010417	1.87966	0.0289324
asRNA:CR46262	FBgn0267995	1.88067	0.0232633
lncRNA:CR43970	FBgn0264701	1.88371	0.0392864
Cpr65Eb	FBgn0035736	1.88385	0.0477853
NfI	FBgn0042696	1.88509	0.0334658
snmRNA:254	FBgn0065100	1.89488	0.0275412
CG9911	FBgn0030734	1.90518	0.0264906
lncRNA:CR45589	FBgn0267149	1.90545	0.0444255
Mtl	FBgn0039532	1.91067	0.0289419
lncRNA:CR45741	FBgn0267305	1.91385	0.0395325
Trs23	FBgn0260861	1.91408	0.0449934
mir-4969	FBgn0263521	1.91482	0.0197899
mir-999	FBgn0262331	1.91482	0.0197899
CG13766	FBgn0031834	1.92052	0.0386523
CG12929	FBgn0033429	1.9322	0.0217017
ova	FBgn0032197	1.93296	0.0316014
lncRNA:CR44733	FBgn0265946	1.93513	0.0196574
CG30096	FBgn0050096	1.93562	0.0318096
Rab5	FBgn0014010	1.94069	0.0313364
CG13532	FBgn0034788	1.94269	0.0204619
asRNA:CR44029	FBgn0264821	1.943	0.0401003
Hsp26	FBgn0001225	1.94585	0.0173386
lncRNA:CR45444	FBgn0266993	1.94915	0.0385009
mir-965	FBgn0262252	1.95109	0.0207079
Aos1	FBgn0029512	1.95179	0.0233863
Drep2	FBgn0028408	1.95489	0.033428
lncRNA:CR45670	FBgn0267230	1.95712	0.029434
mir-4947	FBgn0263579	1.95795	0.0453909
CG31525	FBgn0051525	1.96072	0.0356899
CG45545	FBgn0267105	1.96324	0.0363714
CG4409	FBgn0034128	1.97447	0.0271153
CG14650	FBgn0037252	1.97645	0.0300303
asRNA:CR45056	FBgn0266416	2.00863	0.0333996
lncRNA:CR44613	FBgn0265824	2.01284	0.0323774
CG30100	FBgn0050100	2.01693	0.031838
CG42372	FBgn0259718	2.01693	0.031838
TBC1d7	FBgn0039158	2.01899	0.0304183
lncRNA:CR44749	FBgn0265962	2.02076	0.0259796
Ptp36E	FBgn0267486	2.02491	0.0324815
asRNA:CR44381	FBgn0265531	2.02696	0.0246072
CG30284	FBgn0050284	2.02731	0.0320367
lncRNA:CR45506	FBgn0267062	2.02774	0.0352546
Arv1	FBgn0052442	2.02941	0.0232728
CG14881	FBgn0038425	2.02984	0.0342608
mir-927	FBgn0262210	2.03007	0.0288189
CG34242	FBgn0085271	2.03301	0.0150009
mir-929	FBgn0262214	2.03425	0.0137043
CG14302	FBgn0038647	2.03511	0.0263013
lncRNA:CR44170	FBgn0265059	2.04643	0.0271058
lncRNA:CR44171	FBgn0265060	2.04643	0.0271058
lncRNA:CR45178	FBgn0266688	2.04834	0.023869
lncRNA:CR43605	FBgn0263802	2.04971	0.0367026
lncRNA:CR44947	FBgn0266252	2.05075	0.0232444
CG4045	FBgn0025629	2.05509	0.0173102
ND-23	FBgn0017567	2.05589	0.0279955
CG33213	FBgn0053213	2.06787	0.0398448
lncRNA:CR43874	FBgn0264466	2.07033	0.0494511
CG34181	FBgn0085210	2.08438	0.0472175
lncRNA:CR44826	FBgn0266073	2.08583	0.0180579
lncRNA:CR44771	FBgn0265996	2.09203	0.0344123
Sgt1	FBgn0265101	2.09267	0.0283362
CG15880	FBgn0031283	2.09386	0.0396744
lncRNA:CR45689	FBgn0267249	2.09477	0.029964
lncRNA:CR43415	FBgn0263334	2.09623	0.020566
Acp53C14c	FBgn0053530	2.10183	0.0379803
asRNA:CR43877	FBgn0264469	2.10417	0.0216544
hd	FBgn0086695	2.1206	0.0211811
fid	FBgn0259146	2.12073	0.0338065
mir-184	FBgn0262391	2.12288	0.0223642
pen-2	FBgn0053198	2.12688	0.0209635
GstT1	FBgn0050000	2.12994	0.0378857
CG31917	FBgn0031668	2.13257	0.0211811
Tfb5	FBgn0265968	2.13257	0.0211811
CG6310	FBgn0036121	2.1356	0.0341567
lncRNA:CR43893	FBgn0264485	2.14058	0.0211244
lncRNA:CR43264	FBgn0262945	2.14564	0.0348949
tRNA:Glu-CTC-6-1Psi	FBgn0052761	2.14564	0.0348949
CG8248	FBgn0033347	2.15757	0.0247681
mir-7	FBgn0262370	2.16019	0.0242854
CG34453	FBgn0085482	2.1672	0.0385482
CG43055	FBgn0262357	2.1753	0.0226765
lncRNA:CR45788	FBgn0267438	2.17665	0.0329074
CG43191	FBgn0262820	2.1793	0.0187677
mir-4964	FBgn0263519	2.18344	0.0350369
lncRNA:CR45562	FBgn0267122	2.18404	0.0387753
CG43445	FBgn0263399	2.18558	0.0241908
lncRNA:CR46023	FBgn0267687	2.1859	0.047227
CG12898	FBgn0033516	2.18903	0.0397501
CG4456	FBgn0001228	2.19102	0.0190895
lncRNA:CR45636	FBgn0267196	2.19288	0.0332482
lncRNA:CR46088	FBgn0267757	2.19544	0.0223737
lncRNA:CR44496	FBgn0265689	2.19914	0.0224967
lncRNA:CR45587	FBgn0267147	2.2019	0.0352167
CG4783	FBgn0038756	2.20399	0.0351694
lncRNA:CR43794	FBgn0264338	2.20456	0.0344785
Diap2	FBgn0015247	2.20624	0.0330778
lncRNA:CR43831	FBgn0264379	2.21209	0.027986
snoRNA:Psi28S-612	FBgn0082953	2.22136	0.0140356
CG14563	FBgn0037139	2.22554	0.0321219
CG43307	FBgn0262999	2.23332	0.0352167
CG15403	FBgn0031504	2.23414	0.0248438
lncRNA:CR45625	FBgn0267185	2.23524	0.0152092
snoRNA:Psi28S-3091a	FBgn0082979	2.23764	0.0214083
snoRNA:Psi28S-3091b	FBgn0082978	2.23764	0.0214083
snoRNA:Psi28S-3385a	FBgn0082962	2.23764	0.0214083
snoRNA:Psi28S-3385b	FBgn0082961	2.23764	0.0214083
mRpL36	FBgn0042112	2.23954	0.035018
Sf3b5	FBgn0040534	2.24036	0.0130797
CG13578	FBgn0035000	2.24217	0.0232254
CG4882	FBgn0025336	2.24487	0.0127674
lncRNA:CR45674	FBgn0267234	2.2456	0.019099
Scgbeta	FBgn0038042	2.24912	0.0185879
Alg11	FBgn0037108	2.25105	0.0239069
lncRNA:CR45884	FBgn0267544	2.25297	0.0369487
CG44257	FBgn0265197	2.256	0.036466
lark	FBgn0011640	2.25626	0.0176983
lncRNA:CR45530	FBgn0267086	2.25674	0.0124645
CG11374	FBgn0031214	2.26067	0.0274087
mir-1	FBgn0262455	2.26213	0.0294624
RpLP1	FBgn0002593	2.26476	0.0228185
lncRNA:CR46039	FBgn0267706	2.26605	0.0251656
mir-275	FBgn0262453	2.26855	0.0102404
mir-305	FBgn0262458	2.26855	0.0102404
CG44290	FBgn0265317	2.27988	0.021219
CG4287	FBgn0038388	2.28006	0.0183608
CG31800	FBgn0051800	2.28081	0.0215786
CG43231	FBgn0262876	2.28782	0.0383684
CG44158	FBgn0265041	2.29213	0.0214556
lncRNA:CR44232	FBgn0265163	2.30015	0.0263297
lncRNA:CR44339	FBgn0265427	2.3063	0.0182756
TM4SF	FBgn0020372	2.30851	0.0150577
lncRNA:CR44060	FBgn0264869	2.31182	0.0254401
lncRNA:CR44914	FBgn0266219	2.31301	0.0214083
lncRNA:CR43991	FBgn0264723	2.31923	0.0341094
CG3995	FBgn0038472	2.33553	0.0161461
Mst77F	FBgn0086915	2.33595	0.0325951
snoRNA:Me28S-A30	FBgn0086081	2.33903	0.0150199
RpL41	FBgn0066084	2.35384	0.0182377
CG42855	FBgn0262102	2.35962	0.0212569
eIF1	FBgn0035423	2.36376	0.0131365
snoRNA:M	FBgn0044508	2.37777	0.0160515
snoRNA:Me28S-G980	FBgn0086042	2.37777	0.0160515
strat	FBgn0032020	2.38441	0.0210297
jagn	FBgn0037374	2.38704	0.0206511
Acbp1	FBgn0031992	2.39625	0.016326
mir-2283	FBgn0262180	2.39949	0.0230835
Tsp96F	FBgn0027865	2.40622	0.0250804
Cyt-c-p	FBgn0284248	2.41891	0.015777
lncRNA:CR46079	FBgn0267748	2.4308	0.0206985
lncRNA:CR46080	FBgn0267749	2.4308	0.0206985
CG34183	FBgn0085212	2.43169	0.0227049
CG42759	FBgn0261817	2.45103	0.0403937
Vps36	FBgn0086785	2.46028	0.0473027
CG43447	FBgn0263401	2.46658	0.0166477
mir-281-1	FBgn0286006	2.47121	0.0128336
CG6733	FBgn0039052	2.48537	0.0277494
asRNA:CR44031	FBgn0264823	2.49245	0.0101363
CG4593	FBgn0029929	2.50075	0.0262919
lncRNA:CR44459	FBgn0265652	2.5093	0.0255821
CG34107	FBgn0083943	2.53467	0.0236703
Slc25A46a	FBgn0030717	2.54542	0.0110827
Vps11	FBgn0052350	2.54908	0.0144331
mRpS33	FBgn0038426	2.55951	0.0261688
CG15916	FBgn0030704	2.60152	0.0156161
asRNA:CR43413	FBgn0263332	2.62874	0.0487507
asRNA:CR45830	FBgn0267480	2.63042	0.0313269
CG32259	FBgn0052259	2.64065	0.0182377
mRpL46	FBgn0035272	2.64249	0.0286012
Hsp22	FBgn0001223	2.64355	0.0123699
snoRNA:Me28S-C3420a	FBgn0083988	2.6457	0.0148117
snoRNA:Me28S-C3420b	FBgn0083989	2.6457	0.0148117
r2d2	FBgn0031951	2.65677	0.0201306
lncRNA:CR44788	FBgn0266023	2.69003	0.0286296
lncRNA:CR44770	FBgn0265995	2.6929	0.0166856
CG43218	FBgn0262854	2.69843	0.019771
lncRNA:CR44701	FBgn0265912	2.69886	0.0101552
mir-3642	FBgn0263632	2.69899	0.0206985
CG14711	FBgn0037922	2.70777	0.0246167
lncRNA:CR44915	FBgn0266220	2.71472	0.0167045
lncRNA:CR44196	FBgn0265085	2.72162	0.0297842
Blos2	FBgn0036118	2.72182	0.0151429
asRNA:CR45164	FBgn0266657	2.72549	0.00891539
CG12589	FBgn0040684	2.72557	0.0427409
lncRNA:CR44814	FBgn0266049	2.76236	0.010884
CG44040	FBgn0264832	2.7667	0.0127295
lncRNA:CR45436	FBgn0266985	2.77255	0.0171493
lncRNA:CR45332	FBgn0266871	2.78371	0.0309673
lncRNA:CR46022	FBgn0267686	2.79233	0.0196858
CG9240	FBgn0030669	2.79728	0.0208783
CG31347	FBgn0051347	2.83167	0.00823396
CG3032	FBgn0029928	2.83596	0.0152186
lncRNA:CR44900	FBgn0266205	2.85309	0.020159
lncRNA:CR45006	FBgn0266358	2.86111	0.0112625
tRNA:Met-CAT-1-3	FBgn0052153	2.8664	0.0103161
asRNA:CR45467	FBgn0267023	2.87008	0.0114518
mir-4982	FBgn0263522	2.89302	0.0147454
lncRNA:CR45020	FBgn0266378	2.90344	0.0187015
Mst57Dc	FBgn0011670	2.91013	0.0157581
Drs	FBgn0283461	2.91194	0.0249669
Sfxn1-3	FBgn0037239	2.94543	0.012739
lncRNA:CR44113	FBgn0264944	2.98644	0.0155309
CG17266	FBgn0033089	2.99272	0.0139883
lncRNA:CR46021	FBgn0267685	3.0185	0.0155593
CG12420	FBgn0037797	3.035	0.0111016
CG11885	FBgn0031253	3.06227	0.00839485
lncRNA:CR44453	FBgn0265646	3.07676	0.0355291
lncRNA:CR44935	FBgn0266240	3.09267	0.0266326
lncRNA:CR45043	FBgn0266403	3.1048	0.0109691
lncRNA:CR45983	FBgn0267645	3.10491	0.0148211
bug	FBgn0034050	3.11426	0.00837592
asRNA:CR45969	FBgn0267631	3.14731	0.00400341
lncRNA:CR45597	FBgn0267157	3.14852	0.00636002
CG4101	FBgn0025558	3.16359	0.00545145
asRNA:CR45865	FBgn0267525	3.16359	0.00545145
mir-990	FBgn0262307	3.19455	0.00971039
lncRNA:CR43890	FBgn0264482	3.25618	0.00699413
CG11077	FBgn0039930	3.27017	0.00348287
lncRNA:CR45410	FBgn0266959	3.2718	0.0107515
CG14137	FBgn0036178	3.32046	0.00778913
lncRNA:CR44332	FBgn0265420	3.35537	0.0101647
lncRNA:CR44487	FBgn0265680	3.37733	0.0152281
lncRNA:CR45418	FBgn0266967	3.52001	0.0130986
Taf10	FBgn0028398	3.52119	0.00507288
lncRNA:CR44483	FBgn0265676	3.53206	0.00956843
SLIRP2	FBgn0037602	3.59504	0.00431573
CG12817	FBgn0037798	3.62138	0.00739163
lncRNA:CR45333	FBgn0266872	3.69475	0.0156634
CG10674	FBgn0035592	3.71986	0.00462805
asRNA:CR45469	FBgn0267025	3.82691	0.00395609
lncRNA:CR43884	FBgn0264476	4.02745	0.00654931
asRNA:CR45160	FBgn0266653	4.14752	0.00303805
ox	FBgn0011227	4.23685	0.00258376
CG30172	FBgn0050172	4.43699	0.00209161
