# Supplementary material for: A KDM5–Prospero transcriptional axis functions during early neurodevelopment to regulate mushroom body formation
Source: eLife journal article supplement (doi:10.7554/elife.63886), 2021-03-17
Supplement: supp [file elife-63886-supp-v1.zip › elife_poa_e63886_Supplementary_file_4.xlsx]

## Sheet: Sheet1
GO biological process complete	Drosophila melanogaster - REFLIST (13781)	kdm5_overlap (85)	kdm5_overlap (expected)	kdm5_overlap (over/under)	kdm5_overlap (fold Enrichment)	kdm5_overlap (raw P-value)	kdm5_overlap (FDR)
regulation of macromolecule biosynthetic process (GO:0010556)	1324	40	8.17	+	4.9	1.08e-18	4.23e-15
regulation of cellular macromolecule biosynthetic process (GO:2000112)	1318	40	8.13	+	4.92	9.18e-19	7.22e-15
regulation of biosynthetic process (GO:0009889)	1376	40	8.49	+	4.71	4.09e-18	8.04e-15
regulation of cellular biosynthetic process (GO:0031326)	1372	40	8.46	+	4.73	3.7e-18	9.69e-15
regulation of nitrogen compound metabolic process (GO:0051171)	1848	45	11.4	+	3.95	8.16e-18	1.28e-14
regulation of primary metabolic process (GO:0080090)	1869	45	11.53	+	3.9	1.26e-17	1.65e-14
regulation of gene expression (GO:0010468)	1567	41	9.67	+	4.24	5.02e-17	3.94e-14
regulation of nucleic acid-templated transcription (GO:1903506)	1153	36	7.11	+	5.06	4.77e-17	4.17e-14
regulation of transcription, DNA-templated (GO:0006355)	1153	36	7.11	+	5.06	4.77e-17	4.69e-14
regulation of RNA biosynthetic process (GO:2001141)	1153	36	7.11	+	5.06	4.77e-17	5.36e-14
regulation of nucleobase-containing compound metabolic process (GO:0019219)	1330	38	8.2	+	4.63	7.66e-17	5.47e-14
regulation of macromolecule metabolic process (GO:0060255)	2010	45	12.4	+	3.63	2.02e-16	1.32e-13
regulation of RNA metabolic process (GO:0051252)	1292	37	7.97	+	4.64	2.23e-16	1.35e-13
regulation of cellular metabolic process (GO:0031323)	1983	44	12.23	+	3.6	7.79e-16	4.38e-13
regulation of metabolic process (GO:0019222)	2176	45	13.42	+	3.35	3.98e-15	2.08e-12
regulation of cellular process (GO:0050794)	3585	56	22.11	+	2.53	1.94e-14	9.55e-12
system development (GO:0048731)	1677	38	10.34	+	3.67	1.27e-13	5.88e-11
biological regulation (GO:0065007)	4351	60	26.84	+	2.24	2.3e-13	1.01e-10
regulation of transcription by RNA polymerase II (GO:0006357)	745	26	4.6	+	5.66	3.44e-13	1.42e-10
negative regulation of RNA metabolic process (GO:0051253)	389	20	2.4	+	8.34	3.78e-13	1.49e-10
negative regulation of nucleobase-containing compound metabolic process (GO:0045934)	405	20	2.5	+	8.01	7.71e-13	2.89e-10
central nervous system development (GO:0007417)	266	17	1.64	+	10.36	1.05e-12	3.76e-10
regulation of biological process (GO:0050789)	3890	56	23.99	+	2.33	1.17e-12	3.98e-10
negative regulation of nucleic acid-templated transcription (GO:1903507)	370	19	2.28	+	8.33	1.64e-12	4.96e-10
negative regulation of transcription, DNA-templated (GO:0045892)	370	19	2.28	+	8.33	1.64e-12	5.16e-10
negative regulation of RNA biosynthetic process (GO:1902679)	370	19	2.28	+	8.33	1.64e-12	5.38e-10
negative regulation of cellular macromolecule biosynthetic process (GO:2000113)	438	20	2.7	+	7.4	3.06e-12	8.59e-10
negative regulation of macromolecule biosynthetic process (GO:0010558)	438	20	2.7	+	7.4	3.06e-12	8.9e-10
negative regulation of biosynthetic process (GO:0009890)	454	20	2.8	+	7.14	5.73e-12	1.5e-09
negative regulation of cellular biosynthetic process (GO:0031327)	454	20	2.8	+	7.14	5.73e-12	1.55e-09
negative regulation of nitrogen compound metabolic process (GO:0051172)	602	22	3.71	+	5.92	1.43e-11	3.63e-09
multicellular organism development (GO:0007275)	2287	41	14.11	+	2.91	1.73e-11	4.25e-09
developmental process (GO:0032502)	2758	45	17.01	+	2.65	2.11e-11	5.03e-09
nervous system development (GO:0007399)	1063	28	6.56	+	4.27	2.49e-11	5.76e-09
negative regulation of gene expression (GO:0010629)	566	21	3.49	+	6.02	3.49e-11	7.83e-09
negative regulation of cellular metabolic process (GO:0031324)	660	22	4.07	+	5.4	8.03e-11	1.75e-08
negative regulation of cellular process (GO:0048523)	1224	28	7.55	+	3.71	6.16e-10	1.27e-07
negative regulation of macromolecule metabolic process (GO:0010605)	736	22	4.54	+	4.85	6.01e-10	1.28e-07
animal organ development (GO:0048513)	1166	27	7.19	+	3.75	1.07e-09	2.16e-07
anatomical structure development (GO:0048856)	2633	41	16.24	+	2.52	1.46e-09	2.86e-07
generation of neurons (GO:0048699)	860	23	5.3	+	4.34	1.84e-09	3.52e-07
negative regulation of metabolic process (GO:0009892)	788	22	4.86	+	4.53	2.08e-09	3.9e-07
multicellular organismal process (GO:0032501)	3459	47	21.33	+	2.2	3.8e-09	6.95e-07
cell differentiation (GO:0030154)	1622	31	10	+	3.1	4.05e-09	7.24e-07
neurogenesis (GO:0022008)	902	23	5.56	+	4.13	4.48e-09	7.82e-07
regulation of neural precursor cell proliferation (GO:2000177)	58	8	0.36	+	22.36	6.13e-09	1.05e-06
cellular developmental process (GO:0048869)	1664	31	10.26	+	3.02	7.43e-09	1.24e-06
regulation of cell differentiation (GO:0045595)	421	16	2.6	+	6.16	7.71e-09	1.26e-06
cellular process (GO:0009987)	6632	67	40.91	+	1.64	1.01e-08	1.62e-06
negative regulation of biological process (GO:0048519)	1417	28	8.74	+	3.2	1.54e-08	2.41e-06
negative regulation of transcription by RNA polymerase II (GO:0000122)	223	12	1.38	+	8.72	1.87e-08	2.89e-06
regulation of cell development (GO:0060284)	351	14	2.16	+	6.47	4.18e-08	6.32e-06
cell fate commitment (GO:0045165)	305	13	1.88	+	6.91	6.37e-08	9.45e-06
regulation of neurogenesis (GO:0050767)	268	12	1.65	+	7.26	1.29e-07	1.87e-05
regulation of developmental process (GO:0050793)	754	19	4.65	+	4.09	1.58e-07	2.25e-05
sensory organ development (GO:0007423)	461	15	2.84	+	5.28	1.72e-07	2.41e-05
head development (GO:0060322)	138	9	0.85	+	10.57	2.75e-07	3.79e-05
cell fate determination (GO:0001709)	139	9	0.86	+	10.5	2.91e-07	3.94e-05
positive regulation of cellular process (GO:0048522)	1458	26	8.99	+	2.89	4.49e-07	5.98e-05
anatomical structure morphogenesis (GO:0009653)	1470	26	9.07	+	2.87	5.25e-07	6.88e-05
brain development (GO:0007420)	116	8	0.72	+	11.18	8.82e-07	0.000114
positive regulation of biological process (GO:0048518)	1641	27	10.12	+	2.67	1.2e-06	0.000153
regulation of cell population proliferation (GO:0042127)	222	10	1.37	+	7.3	1.48e-06	0.000185
tube development (GO:0035295)	708	17	4.37	+	3.89	1.52e-06	0.000187
regulation of nervous system development (GO:0051960)	363	12	2.24	+	5.36	2.85e-06	0.000345
regulation of multicellular organismal development (GO:2000026)	583	15	3.6	+	4.17	3.04e-06	0.000363
tube morphogenesis (GO:0035239)	514	14	3.17	+	4.42	3.58e-06	0.00042
tissue development (GO:0009888)	1037	20	6.4	+	3.13	4.34e-06	0.000502
epithelium development (GO:0060429)	948	19	5.85	+	3.25	4.61e-06	0.000525
regulation of multicellular organismal process (GO:0051239)	771	17	4.76	+	3.57	4.71e-06	0.000529
asymmetric cell division (GO:0008356)	103	7	0.64	+	11.02	4.84e-06	0.000536
epithelial tube morphogenesis (GO:0060562)	470	13	2.9	+	4.48	7.07e-06	0.000772
biological_process (GO:0008150)	11180	83	68.96	+	1.2	8.47e-06	0.000888
Unclassified (UNCLASSIFIED)	2601	2	16.04	-	0.12	8.47e-06	0.0009
imaginal disc development (GO:0007444)	555	14	3.42	+	4.09	8.45e-06	0.00091
asymmetric neuroblast division (GO:0055059)	42	5	0.26	+	19.3	9.63e-06	0.000996
animal organ morphogenesis (GO:0009887)	729	16	4.5	+	3.56	9.94e-06	0.00101
neuroblast division (GO:0055057)	44	5	0.27	+	18.42	1.19e-05	0.00119
positive regulation of cellular metabolic process (GO:0031325)	842	17	5.19	+	3.27	1.47e-05	0.00146
positive regulation of macromolecule biosynthetic process (GO:0010557)	515	13	3.18	+	4.09	1.83e-05	0.0018
positive regulation of nitrogen compound metabolic process (GO:0051173)	777	16	4.79	+	3.34	2.16e-05	0.00209
tissue morphogenesis (GO:0048729)	609	14	3.76	+	3.73	2.34e-05	0.00224
neuron differentiation (GO:0030182)	697	15	4.3	+	3.49	2.46e-05	0.00233
cell division (GO:0051301)	247	9	1.52	+	5.91	2.62e-05	0.00246
neuroblast proliferation (GO:0007405)	55	5	0.34	+	14.74	3.22e-05	0.00294
neural precursor cell proliferation (GO:0061351)	55	5	0.34	+	14.74	3.22e-05	0.00298
ganglion mother cell fate determination (GO:0007402)	8	3	0.05	+	60.8	3.54e-05	0.0032
positive regulation of biosynthetic process (GO:0009891)	556	13	3.43	+	3.79	3.99e-05	0.00345
positive regulation of cellular biosynthetic process (GO:0031328)	556	13	3.43	+	3.79	3.99e-05	0.00349
positive regulation of metabolic process (GO:0009893)	911	17	5.62	+	3.03	3.95e-05	0.00349
positive regulation of macromolecule metabolic process (GO:0010604)	817	16	5.04	+	3.18	3.93e-05	0.00351
stem cell fate determination (GO:0048867)	31	4	0.19	+	20.92	5.96e-05	0.00509
compound eye development (GO:0048749)	345	10	2.13	+	4.7	6.06e-05	0.00512
asymmetric stem cell division (GO:0098722)	64	5	0.39	+	12.67	6.35e-05	0.00525
stem cell proliferation (GO:0072089)	64	5	0.39	+	12.67	6.35e-05	0.00531
eye-antennal disc development (GO:0035214)	65	5	0.4	+	12.47	6.8e-05	0.00557
morphogenesis of an epithelium (GO:0002009)	591	13	3.65	+	3.57	7.35e-05	0.00596
neuron projection development (GO:0031175)	432	11	2.66	+	4.13	7.93e-05	0.00636
histoblast morphogenesis (GO:0007488)	12	3	0.07	+	40.53	9.59e-05	0.00762
anterior/posterior pattern specification (GO:0009952)	168	7	1.04	+	6.76	9.76e-05	0.00767
sensory system development (GO:0048880)	368	10	2.27	+	4.41	0.000102	0.00779
visual system development (GO:0150063)	368	10	2.27	+	4.41	0.000102	0.00786
eye development (GO:0001654)	368	10	2.27	+	4.41	0.000102	0.00794
post-embryonic development (GO:0009791)	619	13	3.82	+	3.4	0.000116	0.00877
cell population proliferation (GO:0008283)	122	6	0.75	+	7.97	0.000133	0.00983
regionalization (GO:0003002)	458	11	2.82	+	3.89	0.000131	0.00984
stem cell fate commitment (GO:0048865)	39	4	0.24	+	16.63	0.000135	0.00994
post-embryonic animal organ development (GO:0048569)	461	11	2.84	+	3.87	0.000139	0.0101
cellular component organization (GO:0016043)	2608	31	16.09	+	1.93	0.000142	0.0102
axonogenesis (GO:0007409)	314	9	1.94	+	4.65	0.000157	0.0112
positive regulation of gene expression (GO:0010628)	556	12	3.43	+	3.5	0.00017	0.0121
cellular component organization or biogenesis (GO:0071840)	2754	32	16.99	+	1.88	0.000184	0.0129
imaginal disc morphogenesis (GO:0007560)	399	10	2.46	+	4.06	0.000194	0.0134
post-embryonic animal organ morphogenesis (GO:0048563)	399	10	2.46	+	4.06	0.000194	0.0135
axon development (GO:0061564)	325	9	2	+	4.49	0.000202	0.0138
neuroblast differentiation (GO:0014016)	45	4	0.28	+	14.41	0.000226	0.0153
cell morphogenesis involved in neuron differentiation (GO:0048667)	407	10	2.51	+	3.98	0.000227	0.0153
neuron fate commitment (GO:0048663)	86	5	0.53	+	9.43	0.000236	0.0156
plasma membrane bounded cell projection morphogenesis (GO:0120039)	410	10	2.53	+	3.95	0.00024	0.0156
neuron projection morphogenesis (GO:0048812)	409	10	2.52	+	3.96	0.000236	0.0157
cell projection morphogenesis (GO:0048858)	410	10	2.53	+	3.95	0.00024	0.0158
pattern specification process (GO:0007389)	499	11	3.08	+	3.57	0.000272	0.0174
axon guidance (GO:0007411)	266	8	1.64	+	4.88	0.000271	0.0175
cell part morphogenesis (GO:0032990)	418	10	2.58	+	3.88	0.00028	0.0177
cell development (GO:0048468)	1290	19	7.96	+	2.39	0.000293	0.0184
taxis (GO:0042330)	344	9	2.12	+	4.24	0.000304	0.0188
stem cell division (GO:0017145)	91	5	0.56	+	8.91	0.000303	0.0189
positive regulation of transcription by RNA polymerase II (GO:0045944)	346	9	2.13	+	4.22	0.000317	0.0195
neuron projection guidance (GO:0097485)	275	8	1.7	+	4.72	0.000337	0.0205
response to chemical (GO:0042221)	1107	17	6.83	+	2.49	0.000404	0.0244
chemotaxis (GO:0006935)	284	8	1.75	+	4.57	0.000415	0.0249
instar larval or pupal morphogenesis (GO:0048707)	446	10	2.75	+	3.64	0.000462	0.0275
positive regulation of developmental process (GO:0051094)	291	8	1.79	+	4.46	0.000486	0.0285
cell morphogenesis involved in differentiation (GO:0000904)	449	10	2.77	+	3.61	0.000486	0.0287
negative regulation of cell differentiation (GO:0045596)	102	5	0.63	+	7.95	0.000501	0.0292
positive regulation of multicellular organismal process (GO:0051240)	294	8	1.81	+	4.41	0.000519	0.03
positive regulation of nucleic acid-templated transcription (GO:1903508)	457	10	2.82	+	3.55	0.000556	0.0312
positive regulation of transcription, DNA-templated (GO:0045893)	457	10	2.82	+	3.55	0.000556	0.0314
ocellus development (GO:0008056)	4	2	0.02	+	81.06	0.000548	0.0315
cellular component morphogenesis (GO:0032989)	636	12	3.92	+	3.06	0.000564	0.0315
positive regulation of RNA biosynthetic process (GO:1902680)	457	10	2.82	+	3.55	0.000556	0.0317
positive regulation of neuroblast proliferation (GO:0002052)	24	3	0.15	+	20.27	0.000585	0.0324
post-embryonic animal morphogenesis (GO:0009886)	462	10	2.85	+	3.51	0.000604	0.0332
instar larval or pupal development (GO:0002165)	551	11	3.4	+	3.24	0.000618	0.0337
positive regulation of neural precursor cell proliferation (GO:2000179)	25	3	0.15	+	19.46	0.000652	0.0353
wing disc development (GO:0035220)	387	9	2.39	+	3.77	0.000699	0.0376
neuron development (GO:0048666)	561	11	3.46	+	3.18	0.000715	0.0382
metamorphosis (GO:0007552)	473	10	2.92	+	3.43	0.000722	0.0383
regulation of axonogenesis (GO:0050770)	63	4	0.39	+	10.29	0.000751	0.0396
positive regulation of RNA metabolic process (GO:0051254)	480	10	2.96	+	3.38	0.000806	0.0422
positive regulation of cell development (GO:0010720)	174	6	1.07	+	5.59	0.000824	0.0429
renal tubule development (GO:0061326)	65	4	0.4	+	9.98	0.00084	0.0431
cytoplasmic translation (GO:0002181)	115	5	0.71	+	7.05	0.000843	0.0431
Malpighian tubule development (GO:0072002)	65	4	0.4	+	9.98	0.00084	0.0434
positive regulation of stem cell proliferation (GO:2000648)	28	3	0.17	+	17.37	0.000883	0.0448
positive regulation of neurogenesis (GO:0050769)	118	5	0.73	+	6.87	0.000943	0.0475
heterochromatin organization involved in chromatin silencing (GO:0070868)	29	3	0.18	+	16.77	0.00097	0.0486
regulation of locomotion (GO:0040012)	119	5	0.73	+	6.81	0.000978	0.0486
positive regulation of nucleobase-containing compound metabolic process (GO:0045935)	494	10	3.05	+	3.28	0.000999	0.0494
