# Supplementary material for: A KDM5–Prospero transcriptional axis functions during early neurodevelopment to regulate mushroom body formation
Source: eLife journal article supplement (doi:10.7554/elife.63886), 2021-03-17
Supplement: supp [file elife-63886-supp-v1.zip › elife_poa_e63886_Supplementary_file_6.xlsx]

## Sheet: Sheet1
KDM5 Regulated			KDM5-regulated and Pros-bound
FBgn0041707	7B2
FBgn0000042	Act5C
FBgn0003884	alphaTub84B
FBgn0029512	Aos1
FBgn0023535	arg
FBgn0000137	ase
FBgn0051144	asRNA:CR31144
FBgn0264368	asRNA:CR43820
FBgn0264819	asRNA:CR44027
FBgn0264823	asRNA:CR44031
FBgn0264902	asRNA:CR44093
FBgn0264955	asRNA:CR44124
FBgn0265380	asRNA:CR44321
FBgn0265428	asRNA:CR44340
FBgn0265531	asRNA:CR44381
FBgn0266628	asRNA:CR45135
FBgn0266639	asRNA:CR45146
FBgn0266795	asRNA:CR45257
FBgn0266945	asRNA:CR45396
FBgn0266946	asRNA:CR45397
FBgn0267081	asRNA:CR45525
FBgn0267171	asRNA:CR45611
FBgn0267533	asRNA:CR45873
FBgn0267762	asRNA:CR46093
FBgn0267820	asRNA:CR46145
FBgn0010612	ATPsynG
FBgn0031453	Bacc
FBgn0284243	betaTub56D
FBgn0010520	Bka
FBgn0261284	bou
FBgn0024250	brk
FBgn0013755	Bro
FBgn0005585	Calr
FBgn0004878	cas
FBgn0032822	CG10466
FBgn0039930	CG11077
FBgn0030311	CG11699
FBgn0029856	CG11700
FBgn0031638	CG11927
FBgn0033945	CG12868
FBgn0033429	CG12929
FBgn0033627	CG13204
FBgn0035643	CG13287
FBgn0035139	CG13891
FBgn0260451	CG14042
FBgn0029596	CG14054
FBgn0038596	CG14312
FBgn0038540	CG14321
FBgn0030584	CG14407
FBgn0037220	CG14641
FBgn0035495	CG14989
FBgn0033076	CG15233
FBgn0033104	CG15237
FBgn0030137	CG15317
FBgn0029955	CG15478
FBgn0032483	CG15482
FBgn0030673	CG15601
FBgn0038830	CG17272
FBgn0031426	CG18641
FBgn0033286	CG2127
FBgn0027544	CG2217
FBgn0051347	CG31347
FBgn0051525	CG31525
FBgn0047178	CG32147
FBgn0052182	CG32182
FBgn0052267	CG32267
FBgn0052450	CG32450
FBgn0052625	CG32625
FBgn0052806	CG32806
FBgn0053137	CG33137
FBgn0053155	CG33155
FBgn0036008	CG3408
FBgn0085329	CG34300
FBgn0035998	CG3437
FBgn0040396	CG3939
FBgn0025629	CG4045
FBgn0259722	CG42376
FBgn0259738	CG42392
FBgn0259739	CG42393
FBgn0260756	CG42554
FBgn0261704	CG42740
FBgn0262576	CG43116
FBgn0262820	CG43191
FBgn0263399	CG43445
FBgn0265177	CG44242
FBgn0265632	CG44439
FBgn0035982	CG4461
FBgn0266977	CG45428
FBgn0037891	CG5214
FBgn0035675	CG6610
FBgn0032652	CG6870
FBgn0037133	CG7370
FBgn0034008	CG8152
FBgn0031777	CG9154
FBgn0037635	CG9837
FBgn0000308	chic
FBgn0028387	chm
FBgn0043002	Chrac-14
FBgn0034802	CNBP
FBgn0000339	cni
FBgn0263911	COX8
FBgn0262510	CR43080
FBgn0266940	CR45391
FBgn0020309	crol
FBgn0013767	Crz
FBgn0004432	Cyp1
FBgn0039283	danr
FBgn0010316	dap
FBgn0262636	dati
FBgn0260635	Diap1
FBgn0033248	Dic3
FBgn0002633	E(spl)m7-HLH
FBgn0000591	E(spl)m8-HLH
FBgn0002733	E(spl)mbeta-HLH
FBgn0002735	E(spl)mgamma-HLH
FBgn0284245	eEF1alpha1
FBgn0260400	elav
FBgn0000575	emc
FBgn0039259	EMC6
FBgn0287768	esg
FBgn0005658	Ets65A
FBgn0037475	Fer1
FBgn0038402	Fer2
FBgn0039969	Fis1
FBgn0004516	Gad1
FBgn0086695	hd
FBgn0027788	Hey
FBgn0031459	HINT1
FBgn0035160	hng3
FBgn0286786	hoip
FBgn0032250	holn1
FBgn0266599	Hsc70-4
FBgn0001224	Hsp23
FBgn0001229	Hsp67Bc
FBgn0034224	insb
FBgn0039350	jigr1
FBgn0026064	KP78a
FBgn0026063	KP78b
FBgn0265276	l(3)neo38
FBgn0283426	lncRNA:acal
FBgn0262972	lncRNA:cherub
FBgn0040965	lncRNA:CR13130
FBgn0050055	lncRNA:CR30055
FBgn0051044	lncRNA:CR31044
FBgn0051386	lncRNA:CR31386
FBgn0051451	lncRNA:CR31451
FBgn0052218	lncRNA:CR32218
FBgn0053218	lncRNA:CR33218
FBgn0053963	lncRNA:CR33963
FBgn0261638	lncRNA:CR42721
FBgn0262109	lncRNA:CR42862
FBgn0262974	lncRNA:CR43285
FBgn0262989	lncRNA:CR43297
FBgn0263383	lncRNA:CR43435
FBgn0263626	lncRNA:CR43635
FBgn0263970	lncRNA:CR43724
FBgn0264369	lncRNA:CR43821
FBgn0264439	lncRNA:CR43857
FBgn0264704	lncRNA:CR43973
FBgn0264825	lncRNA:CR44033
FBgn0264833	lncRNA:CR44041
FBgn0264951	lncRNA:CR44120
FBgn0265254	lncRNA:CR44268
FBgn0265299	lncRNA:CR44272
FBgn0265365	lncRNA:CR44306
FBgn0265427	lncRNA:CR44339
FBgn0265444	lncRNA:CR44344
FBgn0265583	lncRNA:CR44410
FBgn0265584	lncRNA:CR44411
FBgn0265587	lncRNA:CR44414
FBgn0265639	lncRNA:CR44446
FBgn0265734	lncRNA:CR44541
FBgn0265743	lncRNA:CR44550
FBgn0265744	lncRNA:CR44551
FBgn0265911	lncRNA:CR44700
FBgn0265946	lncRNA:CR44733
FBgn0265983	lncRNA:CR44762
FBgn0265984	lncRNA:CR44763
FBgn0265996	lncRNA:CR44771
FBgn0265997	lncRNA:CR44772
FBgn0266145	lncRNA:CR44851
FBgn0266151	lncRNA:CR44857
FBgn0266155	lncRNA:CR44861
FBgn0266156	lncRNA:CR44862
FBgn0266235	lncRNA:CR44930
FBgn0266246	lncRNA:CR44941
FBgn0266318	lncRNA:CR44983
FBgn0266586	lncRNA:CR45111
FBgn0266587	lncRNA:CR45112
FBgn0266590	lncRNA:CR45115
FBgn0266768	lncRNA:CR45233
FBgn0266781	lncRNA:CR45246
FBgn0266805	lncRNA:CR45267
FBgn0266956	lncRNA:CR45407
FBgn0266988	lncRNA:CR45439
FBgn0267083	lncRNA:CR45527
FBgn0267116	lncRNA:CR45556
FBgn0267126	lncRNA:CR45566
FBgn0267153	lncRNA:CR45593
FBgn0267155	lncRNA:CR45595
FBgn0267157	lncRNA:CR45597
FBgn0267178	lncRNA:CR45618
FBgn0267203	lncRNA:CR45643
FBgn0267219	lncRNA:CR45659
FBgn0267248	lncRNA:CR45688
FBgn0267259	lncRNA:CR45695
FBgn0267262	lncRNA:CR45698
FBgn0267308	lncRNA:CR45744
FBgn0267570	lncRNA:CR45910
FBgn0267571	lncRNA:CR45911
FBgn0267574	lncRNA:CR45914
FBgn0267575	lncRNA:CR45915
FBgn0267577	lncRNA:CR45917
FBgn0267579	lncRNA:CR45919
FBgn0267582	lncRNA:CR45922
FBgn0267663	lncRNA:CR46001
FBgn0267673	lncRNA:CR46009
FBgn0267723	lncRNA:CR46056
FBgn0267767	lncRNA:CR46098
FBgn0267782	lncRNA:CR46113
FBgn0267826	lncRNA:CR46147
FBgn0267919	lncRNA:CR46200
FBgn0267930	lncRNA:CR46211
FBgn0267949	lncRNA:CR46229
FBgn0019660	lncRNA:roX2
FBgn0283521	lola
FBgn0040020	MED21
FBgn0262424	mir-10
FBgn0262429	mir-13a
FBgn0262367	mir-13b-1
FBgn0262391	mir-184
FBgn0262448	mir-279
FBgn0263539	mir-4978
FBgn0262432	mir-8
FBgn0262302	mir-954
FBgn0262178	mir-981
FBgn0262283	mir-985
FBgn0262404	mir-996
FBgn0021776	mira
FBgn0050481	mRpL53
FBgn0038678	mRpL55
FBgn0287696	mus302
FBgn0031505	ND-B14.5B
FBgn0037230	Nepl11
FBgn0028999	nerfin-1
FBgn0005771	noc
FBgn0004108	Nrt
FBgn0032651	Oli
FBgn0025360	Optix
FBgn0011227	ox
FBgn0036893	PIG-F
FBgn0004595	pros
FBgn0015791	Rab14
FBgn0283666	Rap2l
FBgn0032034	Rcd4
FBgn0033906	ReepB
FBgn0032202	REPTOR-BP
FBgn0010078	RpL23
FBgn0020910	RpL3
FBgn0023170	RpL39
FBgn0066084	RpL41
FBgn0004867	RpS2
FBgn0030136	RpS28b
FBgn0038042	Scgbeta
FBgn0259973	Sfp79B
FBgn0037602	SLIRP2
FBgn0264922	smt3
FBgn0003448	sna
FBgn0065076	snoRNA:185
FBgn0263466	snoRNA:lola-a
FBgn0263481	snoRNA:lola-b
FBgn0263482	snoRNA:lola-c
FBgn0263483	snoRNA:lola-d
FBgn0082952	snoRNA:Me18S-A1061
FBgn0025881	snoRNA:Me18S-A1576
FBgn0086056	snoRNA:Me18S-A425
FBgn0086055	snoRNA:Me18S-C1096
FBgn0086053	snoRNA:Me18S-G1358a
FBgn0086054	snoRNA:Me18S-G1358b
FBgn0082950	snoRNA:Me18S-G1952
FBgn0015543	snoRNA:Me28S-A1322
FBgn0082939	snoRNA:Me28S-C3227b
FBgn0063381	snoRNA:Me28S-G3081a
FBgn0082926	snoRNA:Me28S-U1848
FBgn0086066	snoRNA:Me5.8S-G74
FBgn0086072	snoRNA:Or-CD11a
FBgn0086071	snoRNA:Or-CD11b
FBgn0086070	snoRNA:Or-CD11c
FBgn0065047	snoRNA:U3:54Ab
FBgn0263847	snRNA:LU
FBgn0003916	snRNA:U1:21D
FBgn0004183	snRNA:U1:82Eb
FBgn0004185	snRNA:U1:95Ca
FBgn0004186	snRNA:U1:95Cb
FBgn0004187	snRNA:U1:95Cc
FBgn0083987	snRNA:U11
FBgn0004191	snRNA:U2:34ABa
FBgn0003922	snRNA:U2:38ABa
FBgn0003931	snRNA:U4:38AB
FBgn0043022	snRNA:U5:38ABa
FBgn0043021	snRNA:U5:38ABb
FBgn0260470	SP555
FBgn0028398	Taf10
FBgn0015550	tap
FBgn0019650	toy
FBgn0011850	tRNA:Glu-TTC-1-4
FBgn0050250	tRNA:His-GTG-1-2
FBgn0011878	tRNA:His-GTG-1-4
FBgn0011877	tRNA:His-GTG-2-1Psi
FBgn0050215	tRNA:Ile-AAT-1-9
FBgn0052482	tRNA:iMet-CAT-1-3
FBgn0052129	tRNA:Pro-AGG-1-5
FBgn0040070	Trx-2
FBgn0003866	tsh
FBgn0270928	VAChT
FBgn0031424	VGlut
FBgn0037299	Vps37B
FBgn0001983	wor
FBgn0033770	wuc
