# Supplementary figures and images for: A KDM5–Prospero transcriptional axis functions during early neurodevelopment to regulate mushroom body formation
Source: eLife journal article supplement (doi:10.7554/elife.63886), 2021-03-17

A

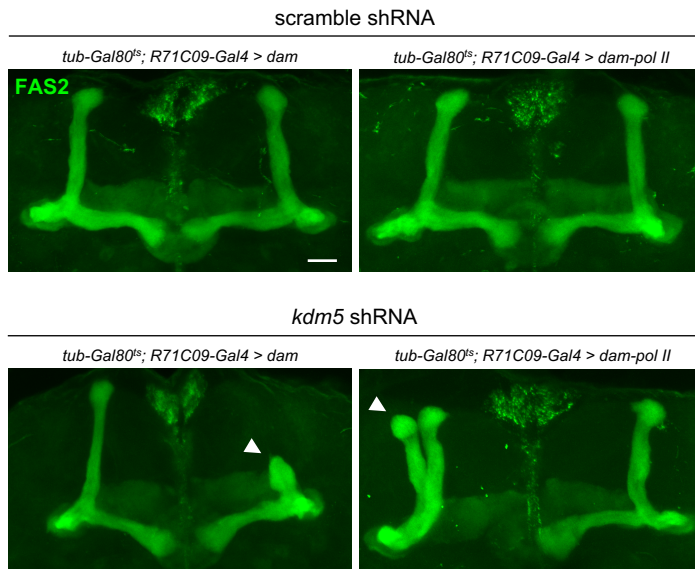

B

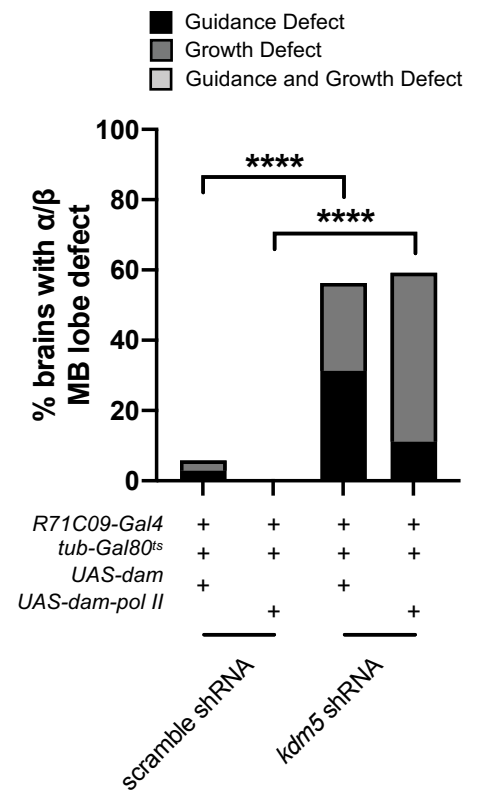

Figure 5 – figure supplement 4

Supplement: supp [file elife-63886-supp-v1.zip]

A

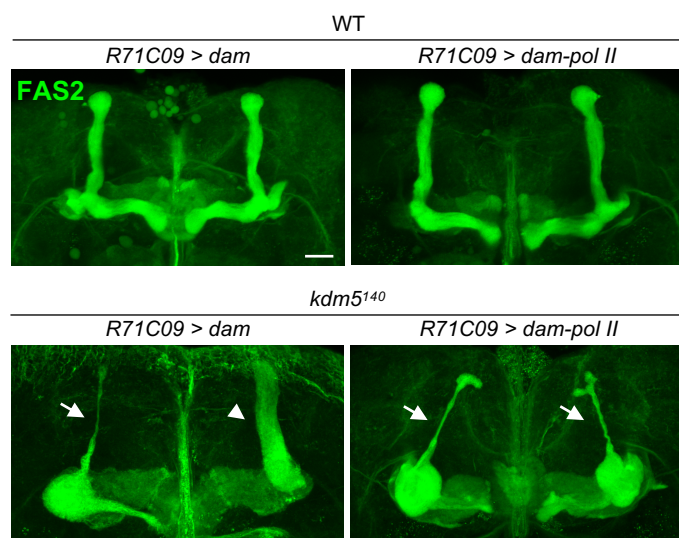

B

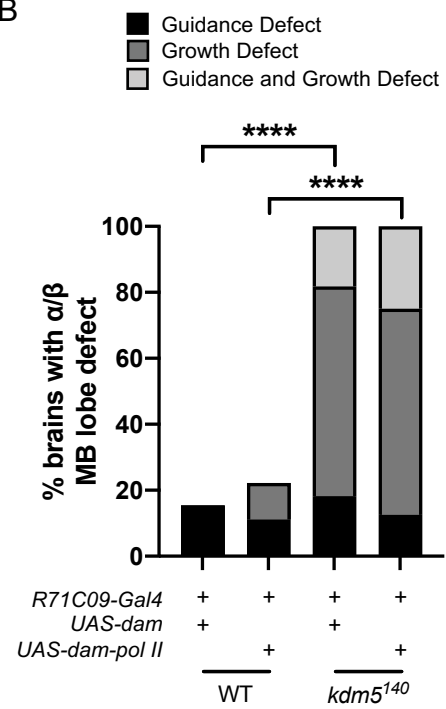

Figure 5 – figure supplement 1

Supplement: supp [file elife-63886-supp-v1.zip]

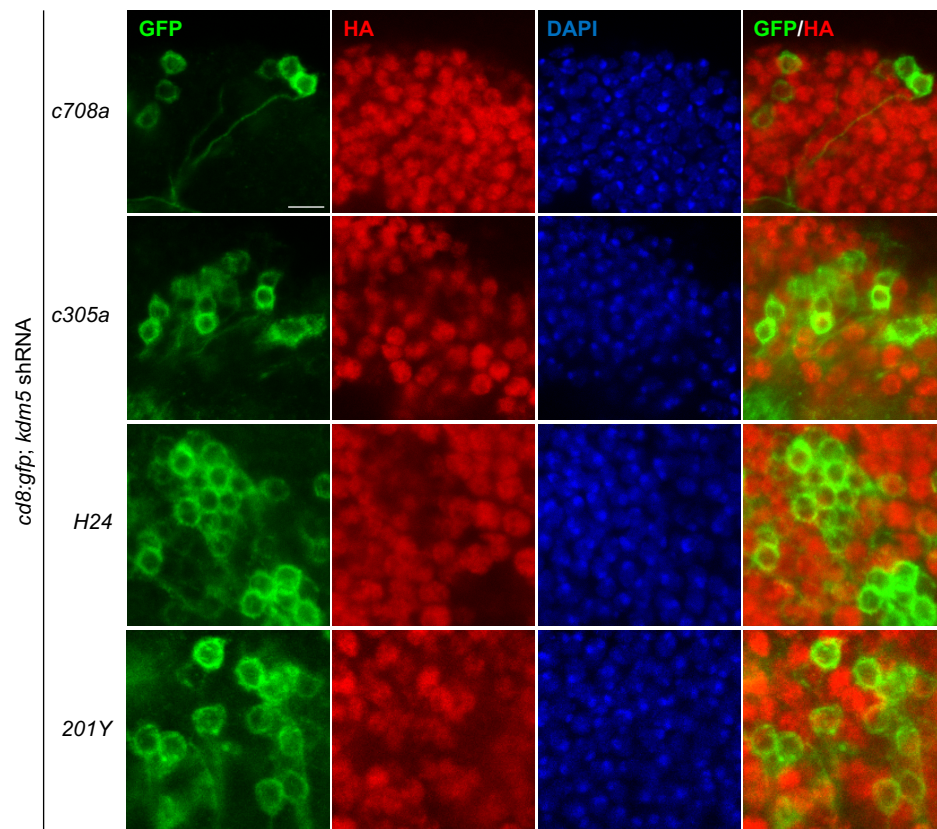

Figure 3 – figure supplement 1

Supplement: supp [file elife-63886-supp-v1.zip › elife_poa_e63886_Figure_3_figure_supplement_1.pdf]

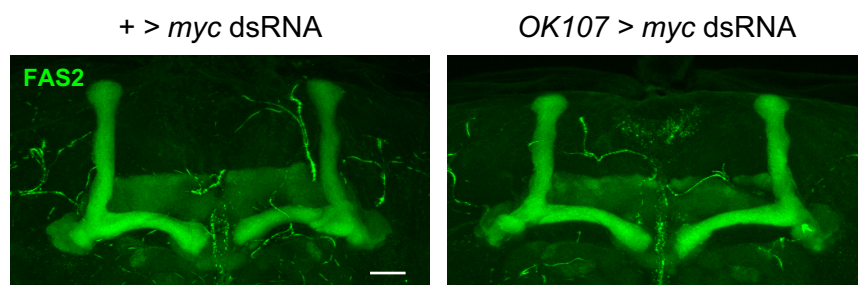

Figure 5 – figure supplement 2

Supplement: supp [file elife-63886-supp-v1.zip › elife_poa_e63886_Figure_5_figure_supplement_2.pdf]

A

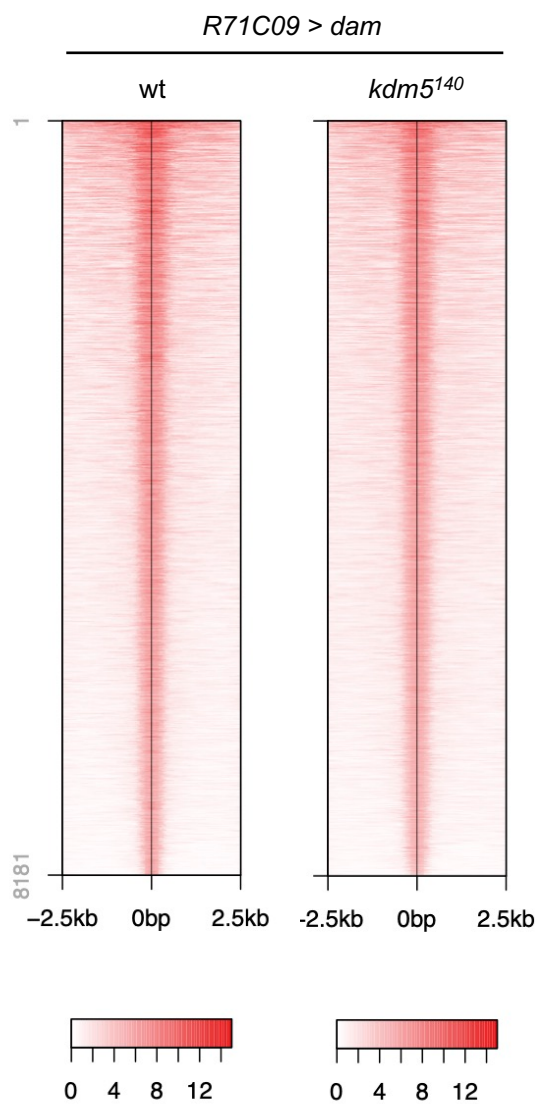

B

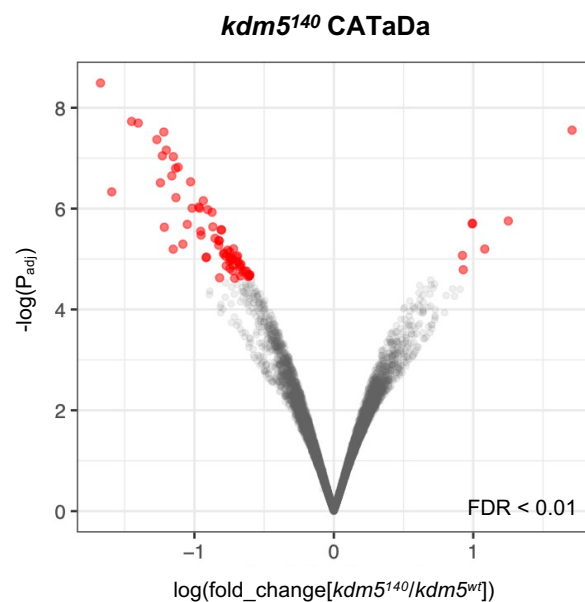

C

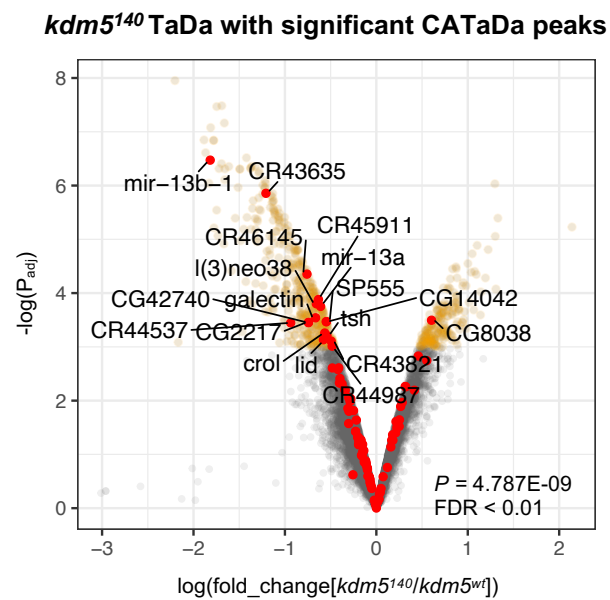

Figure 5 – figure supplement 3

Supplement: supp [file elife-63886-supp-v1.zip › elife_poa_e63886_Figure_5_figure_supplement_3.pdf]

A

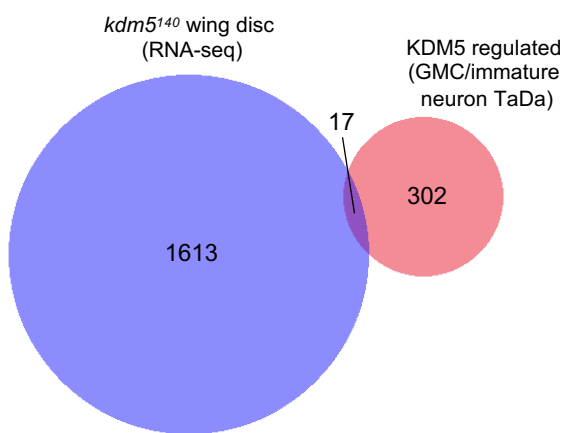

B

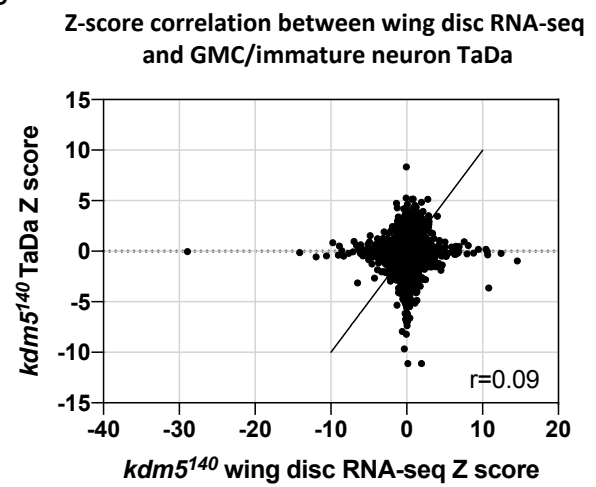

Figure 5 – figure supplement 5

Supplement: supp [file elife-63886-supp-v1.zip › elife_poa_e63886_Figure_5_figure_supplement_5.pdf]
